# Supplementary material for: Unlocking the secrets of pegmatite-type lithium deposits: control of melt-fluid mass ratio
Source: Research Square preprint supplement (doi:10.21203/rs.3.rs-5749452/v1), 2025-02-06
Supplement: Supplementary file 1 [file 2bc5ce2ace6c82004fc4f3a0.xlsx]

## Sheet: Sheet1
Table S1. The initial magma compositions and calculated parameters (temperature, oxygen fugacity, pressure, H2O content) used in the Rhyolite-MELTS modeling
Initial temperature and oxygen fugacity
Location	Rocks	Sample	Mineral	SiO2	TiO2	Al2O3	FeO	MnO	MgO	CaO	Na2O	K2O	Cr2O3	NiO	P2O5	F	Temperature (°C)	logfO2	Transferred ΔFMQ	Reference
				All elements are in wt.%
Markam	Porphyritic granite	MAR14-28	Biotite	35.5212	3.3783	17.782	22.2921	0.3489	7.0398	0.0359	0.1158	9.6642	0.0006	0.042	0.033	0.5842	786			Deschamps et al., 2017	Deschamps, F. et al. Coeval Mantle-Derived and Crust-Derived Magmas Forming Two Neighbouring Plutons in the Songpan Ganze Accretionary Orogenic Wedge (SW China). J. Petrol. 58, 2221-2256 (2017).
		MAR14-28	Biotite	35.8316	3.3338	18.4972	22.1843	0.3271	6.7424	0.0144	0.1131	9.6089	0.0012	0.0586	0.0116	0.5465	775
		MAR14-28	Biotite	35.9531	3.0138	18.9212	22.0014	0.3459	6.9759	0	0.05	9.734	0.0002	0.0306	0.0233	0.5803	776
	Average																779	-14.0729	0.78
Mufushan	Biotite granite	MFS-1	Biotite	37.274	2.997	17.487	20.23	0.302	7.814	0.07	0.057	9.815	0.041	0.002		0.863	812			This study
		MFS-1	Biotite	37.357	2.868	17.359	20.323	0.305	7.782	0.049	0.065	9.622	0.007	0.021		0.896	808
		MFS-1	Biotite	36.768	3.126	17.934	19.42	0.267	7.658	0.057	0.145	9.631	0.022	0.01		0.864	803
		MFS-1	Biotite	37.158	3.124	17.839	19.978	0.286	7.753	0	0.07	9.921	0.033	0		0.891	817
		MFS-1	Biotite	37.406	3.128	17.468	19.384	0.322	7.825	0	0.114	9.856	0.029	0		0.936	817
		MFS-5	Biotite	37.351	2.996	16.018	19.312	0.35	9.862	0	0.093	9.739	0.039	0		0.39	813
		MFS-5	Biotite	36.879	2.958	15.66	20.401	0.359	9.56	0	0.105	9.931	0.027	0		0.491	839
		MFS-5	Biotite	37.154	3	15.815	19.798	0.334	9.891	0	0.111	9.688	0.017	0		0.564	825
		MFS-5	Biotite	36.967	3.07	15.897	19.863	0.329	9.738	0.03	0.108	9.708	0.03	0.002		0.464	824
		MFS-5	Biotite	36.718	2.882	15.728	20.083	0.338	9.656	0	0.106	9.888	0.009	0		0.388	833
	Average																819.1	-12.9599	1.00189
Pressure
Location	Depth (km)	density or rocks (g/cm3)	acceleration of gravity (m/s²)	Pressure	Reference
Markam	~10	2.7	9.8	2550	Xiong et al., 2019	Xiong, X., Li, J., Wang, D., Li, S. & Lin, H. Fluid Characteristics and Evolution of the Zhawulong Granitic Pegmatite Lithium Deposit in the Ganzi-Songpan Region, Southwestern China. Acta Geol. Sin.-Engl. Ed. 93, 943-954 (2019).
Mufushan	~11	2.7	9.8	2800	Li et al., 2019	Li, J. et al. Tantalum and niobium mineralization from F- and Cl-rich fluid in the lepidolite-rich pegmatite from the Renli deposit in northern Hunan, China: Constraints of fluid inclusions and lepidolite crystallization experiments. Ore Geol. Rev. 115, 103187 (2019).
Initial contents for the starting magma
Location	Rocks	Sample	SiO2	TiO2	Al2O3	Fe2O3	FeO	MnO	MgO	CaO	Na2O	K2O	P2O5	L.O.I.	Total	Sr	Ba	Ni	Cr	Zr	Reference
			Major elements are in wt.%													Trace elements are in ppm
Markam	Porphyritic granite	MAR14-28	68.37	0.44	15.87	0.317	2.853	0.05	0.88	2.94	2.76	4.58	0.12	0.6	99.78	318	1093	2.1	n.d.	135.4	Deschamps et al., 2017
Mufushan	Biotite granite	HNDG-1	62.26	0.64	16.25	0.82	4.42	0.18	1.16	2.72	3.31	3.93	1.56	1.74	97.42	68	158	8	22	341	Li, 2017
n.d=not determined
Initial water content
	Mufushan	Ke'eryin
Plagiclase
Xan (xtl)	0.197	0.37
Xab (xtl)	0.803	0.63
Temp ()	819	779
P (Bars)	280	255
Liquid Composition
SiO2 wt%	62.26	68.37
TiO2 wt%	0.64	0.44
Al2O3 wt%	16.25	15.87
FeO Total wt%	5.24	3.17
MgO wt%	1.16	0.88
CaO wt%	2.72	2.94
Na2O wt%	3.31	2.76
K2O wt%	3.93	4.58
wt% H2O calc	4.36596	5.76669
