# Supplementary material for: Unlocking the secrets of pegmatite-type lithium deposits: control of melt-fluid mass ratio
Source: Research Square preprint supplement (doi:10.21203/rs.3.rs-5749452/v1), 2025-02-06
Supplement: Supplementary file 2 [file 85d97f62e582ffd3989aad92.xlsx]

## Sheet: Mufushan
Table S2-1. Modeling results for the Mufushan batholith
T (℃)	P (kbars)	log(10) fO2	liq mass (gm)	F	Fluid (gm)	Melt/fluid	Liquid composition (wt.%)													Solid mass (g)						Mass (%)						Parition coefficient (DRb)						Bulk DRb	Liquid Rb (ppm)	Solid Rb (ppm)	Ms Rb (ppm)	Parition coefficient (DK)						Bulk DK	Liquid K (ppm)
							SiO2	TiO2	Al2O3	Fe2O3	Cr2O3	FeO	MnO	MgO	CaO	Na2O	K2O	P2O5	H2O	biotite	plagioclase	k-feldspar	quartz	muscovite	apatite	biotite	plagioclase	k-feldspar	quartz	muscovite	apatite	biotite	plagioclase	k-feldspar	quartz	muscovite	apatite					biotite	plagioclase	k-feldspar	quartz	muscovite	apatite
991.63	2.8	-9.792	96.9906	1			63.0647	0.437	16.2624	0.7637	0	2.1207	0.1823	1.0678	2.7417	3.3528	3.9808	1.5699	4.4564						0.0234	0	0	0	0	0	1	2	0.06	0.4	0.014	1.6	0.0025	0.0025	400	1	640	2.5	0.1	3.12	0.013	2.5	0	0	37000
989.63	2.8	-9.822	96.9096	0.999164			63.1174	0.4339	16.2724	0.7543	0	2.0892	0.1824	1.0666	2.7265	3.3556	3.9841	1.558	4.4596						0.0536	0	0	0	0	0	1	2	0.06	0.4	0.014	1.6	0.0025	0.0025	400.334	1.00083	640.534	2.5	0.1	3.12	0.013	2.5	0	0	37031
987.63	2.8	-9.852	96.8297	0.998341			63.1695	0.4308	16.2823	0.745	0	2.0582	0.1826	1.0654	2.7116	3.3584	3.9874	1.5463	4.4627						0.0834	0	0	0	0	0	1	2	0.06	0.4	0.014	1.6	0.0025	0.0025	400.663	1.00166	641.061	2.5	0.1	3.12	0.013	2.5	0	0	37061.5
985.63	2.8	-9.882	96.751	0.997529			63.2209	0.4278	16.292	0.7358	0	2.0275	0.1827	1.0642	2.6969	3.3611	3.9907	1.5347	4.4658						0.1128	0	0	0	0	0	1	2	0.06	0.4	0.014	1.6	0.0025	0.0025	400.988	1.00247	641.581	2.5	0.1	3.12	0.013	2.5	0	0	37091.6
983.63	2.8	-9.913	96.6734	0.99673			63.2716	0.4248	16.3017	0.7267	0	1.9973	0.1829	1.063	2.6823	3.3638	3.9939	1.5232	4.4688						0.1417	0	0	0	0	0	1	2	0.06	0.4	0.014	1.6	0.0025	0.0025	401.309	1.00327	642.095	2.5	0.1	3.12	0.013	2.5	0	0	37121.4
981.63	2.8	-9.944	96.597	0.995942			63.3216	0.4218	16.3111	0.7177	0	1.9676	0.183	1.0618	2.668	3.3665	3.997	1.5119	4.4718						0.1701	0	0	0	0	0	1	2	0.06	0.4	0.014	1.6	0.0025	0.0025	401.626	1.00406	642.601	2.5	0.1	3.12	0.013	2.5	0	0	37150.8
979.63	2.8	-9.974	96.5217	0.995165			63.371	0.4189	16.3205	0.7089	0	1.9382	0.1832	1.0607	2.6539	3.3691	4.0001	1.5008	4.4748						0.1981	0	0	0	0	0	1	2	0.06	0.4	0.014	1.6	0.0025	0.0025	401.938	1.00485	643.101	2.5	0.1	3.12	0.013	2.5	0	0	37179.7
977.63	2.8	-10.005	96.4475	0.994401			63.4198	0.416	16.3297	0.7001	0	1.9092	0.1833	1.0595	2.64	3.3717	4.0032	1.4899	4.4777						0.2257	0	0	0	0	0	1	2	0.06	0.4	0.014	1.6	0.0025	0.0025	402.247	1.00562	643.595	2.5	0.1	3.12	0.013	2.5	0	0	37208.3
975.63	2.8	-10.036	96.3744	0.993647			63.4679	0.4131	16.3388	0.6914	0	1.8806	0.1835	1.0583	2.6263	3.3742	4.0062	1.479	4.4806						0.2529	0	0	0	0	0	1	2	0.06	0.4	0.014	1.6	0.0025	0.0025	402.551	1.00638	644.082	2.5	0.1	3.12	0.013	2.5	0	0	37236.6
973.63	2.8	-10.067	96.3024	0.992904			63.5154	0.4103	16.3477	0.6829	0	1.8524	0.1836	1.0572	2.6127	3.3768	4.0092	1.4684	4.4835						0.2796	0	0	0	0	0	1	2	0.06	0.4	0.014	1.6	0.0025	0.0025	402.851	1.00713	644.562	2.5	0.1	3.12	0.013	2.5	0	0	37264.4
971.63	2.8	-10.098	96.2314	0.992172			63.5622	0.4075	16.3566	0.6744	0	1.8246	0.1837	1.056	2.5994	3.3793	4.0122	1.4579	4.4863						0.3059	0	0	0	0	0	1	2	0.06	0.4	0.014	1.6	0.0025	0.0025	403.148	1.00787	645.037	2.5	0.1	3.12	0.013	2.5	0	0	37291.9
969.63	2.8	-10.129	96.1615	0.991451			63.6084	0.4048	16.3653	0.6661	0	1.7971	0.1839	1.0548	2.5862	3.3817	4.0151	1.4475	4.4891						0.3319	0	0	0	0	0	1	2	0.06	0.4	0.014	1.6	0.0025	0.0025	403.44	1.0086	645.504	2.5	0.1	3.12	0.013	2.5	0	0	37319
967.63	2.8	-10.161	96.0926	0.990741			63.654	0.402	16.3739	0.6578	0	1.7701	0.184	1.0537	2.5733	3.3841	4.018	1.4373	4.4918						0.3574	0	0	0	0	0	1	2	0.06	0.4	0.014	1.6	0.0025	0.0025	403.729	1.00932	645.966	2.5	0.1	3.12	0.013	2.5	0	0	37345.8
965.63	2.8	-10.192	96.0247	0.990041			63.6991	0.3994	16.3824	0.6496	0	1.7434	0.1841	1.0525	2.5605	3.3865	4.0208	1.4272	4.4945						0.3825	0	0	0	0	0	1	2	0.06	0.4	0.014	1.6	0.0025	0.0025	404.014	1.01003	646.422	2.5	0.1	3.12	0.013	2.5	0	0	37372.2
963.63	2.8	-10.224	95.9578	0.989351			63.7435	0.3967	16.3907	0.6416	0	1.7171	0.1842	1.0514	2.5479	3.3889	4.0236	1.4173	4.4972						0.4072	0	0	0	0	0	1	2	0.06	0.4	0.014	1.6	0.0025	0.0025	404.295	1.01074	646.871	2.5	0.1	3.12	0.013	2.5	0	0	37398.3
961.63	2.8	-10.255	95.8918	0.988671			63.7873	0.3941	16.3989	0.6336	0	1.6911	0.1844	1.0502	2.5355	3.3912	4.0264	1.4075	4.4998						0.4316	0	0	0	0	0	1	2	0.06	0.4	0.014	1.6	0.0025	0.0025	404.572	1.01143	647.315	2.5	0.1	3.12	0.013	2.5	0	0	37424
959.63	2.8	-10.287	95.8269	0.988002			63.8305	0.3915	16.4071	0.6257	0	1.6655	0.1845	1.0491	2.5232	3.3935	4.0291	1.3979	4.5024						0.4555	0	0	0	0	0	1	2	0.06	0.4	0.014	1.6	0.0025	0.0025	404.845	1.01211	647.753	2.5	0.1	3.12	0.013	2.5	0	0	37449.3
957.63	2.8	-10.319	95.7629	0.987342			63.8732	0.3889	16.4151	0.618	0	1.6402	0.1846	1.0479	2.5112	3.3958	4.0318	1.3883	4.505						0.4791	0	0	0	0	0	1	2	0.06	0.4	0.014	1.6	0.0025	0.0025	405.115	1.01279	648.184	2.5	0.1	3.12	0.013	2.5	0	0	37474.4
955.63	2.8	-10.351	95.6998	0.986692			63.9153	0.3863	16.423	0.6103	0	1.6153	0.1847	1.0468	2.4993	3.398	4.0345	1.379	4.5075						0.5023	0	0	0	0	0	1	2	0.06	0.4	0.014	1.6	0.0025	0.0025	405.382	1.01345	648.61	2.5	0.1	3.12	0.013	2.5	0	0	37499
953.63	2.8	-10.383	95.6377	0.986051			63.9568	0.3838	16.4308	0.6027	0	1.5908	0.1849	1.0457	2.4876	3.4002	4.0371	1.3697	4.51						0.5252	0	0	0	0	0	1	2	0.06	0.4	0.014	1.6	0.0025	0.0025	405.644	1.01411	649.031	2.5	0.1	3.12	0.013	2.5	0	0	37523.4
951.63	2.8	-10.415	95.5765	0.98542			63.9977	0.3813	16.4384	0.5952	0	1.5666	0.185	1.0445	2.476	3.4024	4.0397	1.3607	4.5125						0.5477	0	0	0	0	0	1	2	0.06	0.4	0.014	1.6	0.0025	0.0025	405.903	1.01476	649.445	2.5	0.1	3.12	0.013	2.5	0	0	37547.4
949.63	2.8	-10.447	95.5162	0.984798			64.0381	0.3788	16.446	0.5878	0	1.5427	0.1851	1.0434	2.4646	3.4046	4.0422	1.3517	4.5149						0.5698	0	0	0	0	0	1	2	0.06	0.4	0.014	1.6	0.0025	0.0025	406.159	1.0154	649.854	2.5	0.1	3.12	0.013	2.5	0	0	37571.1
947.63	2.8	-10.479	95.4568	0.984186			64.078	0.3764	16.4535	0.5805	0	1.5191	0.1852	1.0423	2.4534	3.4067	4.0448	1.3429	4.5173						0.5916	0	0	0	0	0	1	2	0.06	0.4	0.014	1.6	0.0025	0.0025	406.411	1.01603	650.258	2.5	0.1	3.12	0.013	2.5	0	0	37594.5
945.63	2.8	-10.512	95.3983	0.983582			64.1173	0.374	16.4608	0.5732	0	1.4959	0.1853	1.0412	2.4424	3.4088	4.0472	1.3342	4.5197						0.613	0	0	0	0	0	1	2	0.06	0.4	0.014	1.6	0.0025	0.0025	406.66	1.01665	650.656	2.5	0.1	3.12	0.013	2.5	0	0	37617.6
943.63	2.8	-10.544	95.3406	0.982988			64.1561	0.3716	16.4681	0.5661	0	1.473	0.1854	1.04	2.4315	3.4108	4.0497	1.3256	4.522						0.6341	0	0	0	0	0	1	2	0.06	0.4	0.014	1.6	0.0025	0.0025	406.905	1.01726	651.048	2.5	0.1	3.12	0.013	2.5	0	0	37640.3
941.63	2.8	-10.577	95.2838	0.982402			64.1943	0.3692	16.4752	0.559	0	1.4504	0.1856	1.0389	2.4208	3.4129	4.0521	1.3172	4.5243						0.6548	0	0	0	0	0	1	2	0.06	0.4	0.014	1.6	0.0025	0.0025	407.147	1.01787	651.436	2.5	0.1	3.12	0.013	2.5	0	0	37662.8
939.63	2.8	-10.61	95.2278	0.981825			64.2321	0.3669	16.4823	0.552	0	1.4282	0.1857	1.0378	2.4103	3.4149	4.0545	1.3088	4.5266						0.6752	0	0	0	0	0	1	2	0.06	0.4	0.014	1.6	0.0025	0.0025	407.386	1.01846	651.817	2.5	0.1	3.12	0.013	2.5	0	0	37684.9
937.63	2.8	-10.643	95.1727	0.981257			64.2693	0.3645	16.4892	0.5451	0	1.4062	0.1858	1.0367	2.3999	3.4168	4.0568	1.3007	4.5289						0.6953	0	0	0	0	0	1	2	0.06	0.4	0.014	1.6	0.0025	0.0025	407.621	1.01905	652.194	2.5	0.1	3.12	0.013	2.5	0	0	37706.8
935.63	2.8	-10.676	95.1184	0.980697			64.306	0.3622	16.4961	0.5383	0	1.3846	0.1859	1.0356	2.3897	3.4188	4.0592	1.2926	4.5311						0.7151	0	0	0	0	0	1	2	0.06	0.4	0.014	1.6	0.0025	0.0025	407.853	1.01963	652.566	2.5	0.1	3.12	0.013	2.5	0	0	37728.3
933.63	2.8	-10.709	95.0649	0.980145			64.3422	0.36	16.5028	0.5316	0	1.3632	0.186	1.0345	2.3796	3.4207	4.0614	1.2847	4.5333						0.7345	0	0	0	0	0	1	2	0.06	0.4	0.014	1.6	0.0025	0.0025	408.082	1.02021	652.932	2.5	0.1	3.12	0.013	2.5	0	0	37749.5
931.63	2.8	-10.742	95.0122	0.979602			64.3779	0.3577	16.5095	0.525	0	1.3422	0.1861	1.0334	2.3697	3.4226	4.0637	1.2769	4.5354						0.7536	0	0	0	0	0	1	2	0.06	0.4	0.014	1.6	0.0025	0.0025	408.308	1.02077	653.293	2.5	0.1	3.12	0.013	2.5	0	0	37770.5
929.63	2.8	-10.775	94.9603	0.979066			64.413	0.3555	16.5161	0.5184	0	1.3214	0.1862	1.0323	2.36	3.4245	4.0659	1.2692	4.5375						0.7724	0	0	0	0	0	1	2	0.06	0.4	0.014	1.6	0.0025	0.0025	408.531	1.02133	653.649	2.5	0.1	3.12	0.013	2.5	0	0	37791.1
927.63	2.8	-10.809	94.9091	0.978539			64.4477	0.3533	16.5226	0.5119	0	1.301	0.1863	1.0312	2.3504	3.4263	4.0681	1.2616	4.5396						0.7908	0	0	0	0	0	1	2	0.06	0.4	0.014	1.6	0.0025	0.0025	408.75	1.02188	654.001	2.5	0.1	3.12	0.013	2.5	0	0	37811.5
925.63	2.8	-10.842	94.8588	0.97802			64.482	0.3511	16.5289	0.5055	0	1.2808	0.1864	1.0301	2.341	3.4281	4.0703	1.2542	4.5417						0.809	0	0	0	0	0	1	2	0.06	0.4	0.014	1.6	0.0025	0.0025	408.967	1.02242	654.347	2.5	0.1	3.12	0.013	2.5	0	0	37831.5
923.63	2.8	-10.876	94.8092	0.977509			64.5157	0.3489	16.5352	0.4992	0	1.2609	0.1865	1.0291	2.3317	3.4299	4.0724	1.2468	4.5437						0.8269	0	0	0	0	0	1	2	0.06	0.4	0.014	1.6	0.0025	0.0025	409.18	1.02295	654.688	2.5	0.1	3.12	0.013	2.5	0	0	37851.3
921.63	2.8	-10.909	94.7603	0.977005			64.5489	0.3467	16.5414	0.4929	0	1.2413	0.1866	1.028	2.3225	3.4317	4.0745	1.2396	4.5457						0.8444	0	0	0	0	0	1	2	0.06	0.4	0.014	1.6	0.0025	0.0025	409.391	1.02348	655.025	2.5	0.1	3.12	0.013	2.5	0	0	37870.8
919.63	2.8	-10.943	94.7122	0.976509			64.5817	0.3446	16.5475	0.4868	0	1.222	0.1867	1.0269	2.3136	3.4335	4.0766	1.2325	4.5477						0.8617	0	0	0	0	0	1	2	0.06	0.4	0.014	1.6	0.0025	0.0025	409.598	1.024	655.357	2.5	0.1	3.12	0.013	2.5	0	0	37890.1
917.63	2.8	-10.977	94.6649	0.976021			64.6141	0.3425	16.5536	0.4807	0	1.2029	0.1868	1.0258	2.3047	3.4352	4.0786	1.2256	4.5497						0.8786	0	0	0	0	0	1	2	0.06	0.4	0.014	1.6	0.0025	0.0025	409.802	1.02451	655.684	2.5	0.1	3.12	0.013	2.5	0	0	37909
915.63	2.8	-11.011	94.6182	0.97554			64.6459	0.3404	16.5595	0.4746	0	1.1841	0.1869	1.0248	2.296	3.4369	4.0806	1.2187	4.5516						0.8953	0	0	0	0	0	1	2	0.06	0.4	0.014	1.6	0.0025	0.0025	410.004	1.02501	656.006	2.5	0.1	3.12	0.013	2.5	0	0	37927.7
913.63	2.8	-11.046	94.5723	0.975066			64.6773	0.3383	16.5654	0.4687	0	1.1656	0.1869	1.0237	2.2875	3.4385	4.0826	1.212	4.5535						0.9116	0	0	0	0	0	1	2	0.06	0.4	0.014	1.6	0.0025	0.0025	410.203	1.02551	656.324	2.5	0.1	3.12	0.013	2.5	0	0	37946.1
911.63	2.8	-11.08	94.527	0.9746			64.7083	0.3363	16.5711	0.4628	0	1.1473	0.187	1.0227	2.2791	3.4402	4.0845	1.2053	4.5554						0.9277	0	0	0	0	0	1	2	0.06	0.4	0.014	1.6	0.0025	0.0025	410.398	1.026	656.637	2.5	0.1	3.12	0.013	2.5	0	0	37964.3
909.63	2.8	-11.114	94.4825	0.974141			64.7387	0.3342	16.5768	0.457	0	1.1294	0.1871	1.0216	2.2708	3.4418	4.0865	1.1988	4.5572						0.9435	0	0	0	0	0	1	2	0.06	0.4	0.014	1.6	0.0025	0.0025	410.591	1.02648	656.946	2.5	0.1	3.12	0.013	2.5	0	0	37982.2
907.63	2.8	-11.149	94.4387	0.973689			64.7688	0.3322	16.5824	0.4513	0	1.1116	0.1872	1.0206	2.2627	3.4434	4.0884	1.1924	4.559						0.959	0	0	0	0	0	1	2	0.06	0.4	0.014	1.6	0.0025	0.0025	410.781	1.02695	657.25	2.5	0.1	3.12	0.013	2.5	0	0	37999.8
905.63	2.8	-11.184	94.3955	0.973244			64.7984	0.3302	16.5879	0.4456	0	1.0941	0.1873	1.0195	2.2547	3.445	4.0902	1.1861	4.5608						0.9742	0	0	0	0	0	1	2	0.06	0.4	0.014	1.6	0.0025	0.0025	410.969	1.02742	657.55	2.5	0.1	3.12	0.013	2.5	0	0	38017.2
903.63	2.8	-11.218	94.353	0.972806			64.8276	0.3282	16.5934	0.44	0	1.0769	0.1874	1.0185	2.2469	3.4465	4.0921	1.1799	4.5626						0.9892	0	0	0	0	0	1	2	0.06	0.4	0.014	1.6	0.0025	0.0025	411.153	1.02788	657.845	2.5	0.1	3.12	0.013	2.5	0	0	38034.3
901.63	2.8	-11.253	94.3112	0.972375			64.8563	0.3262	16.5987	0.4345	0	1.0599	0.1875	1.0174	2.2392	3.4481	4.0939	1.1739	4.5644						1.0039	0	0	0	0	0	1	2	0.06	0.4	0.014	1.6	0.0025	0.0025	411.335	1.02834	658.136	2.5	0.1	3.12	0.013	2.5	0	0	38051.2
899.63	2.8	-11.288	94.2701	0.97195			64.8847	0.3243	16.604	0.429	0	1.0432	0.1875	1.0164	2.2317	3.4496	4.0957	1.1679	4.5661						1.0183	0	0	0	0	0	1	2	0.06	0.4	0.014	1.6	0.0025	0.0025	411.514	1.02879	658.423	2.5	0.1	3.12	0.013	2.5	0	0	38067.8
897.63	2.8	-11.324	94.2295	0.971533			64.9126	0.3223	16.6092	0.4236	0	1.0267	0.1876	1.0154	2.2243	3.451	4.0974	1.1621	4.5678						1.0324	0	0	0	0	0	1	2	0.06	0.4	0.014	1.6	0.0025	0.0025	411.691	1.02923	658.705	2.5	0.1	3.12	0.013	2.5	0	0	38084.2
895.63	2.8	-11.359	94.1897	0.971121			64.94	0.3204	16.6144	0.4183	0	1.0104	0.1877	1.0144	2.217	3.4525	4.0992	1.1563	4.5694						1.0463	0	0	0	0	0	1	2	0.06	0.4	0.014	1.6	0.0025	0.0025	411.865	1.02966	658.984	2.5	0.1	3.12	0.013	2.5	0	0	38100.3
893.63	2.8	-11.394	94.1504	0.970717			64.9671	0.3185	16.6194	0.413	0	0.9944	0.1878	1.0134	2.2099	3.4539	4.1009	1.1507	4.5711						1.0599	0	0	0	0	0	1	2	0.06	0.4	0.014	1.6	0.0025	0.0025	412.036	1.03009	659.258	2.5	0.1	3.12	0.013	2.5	0	0	38116.2
891.63	2.8	-11.43	94.1118	0.970319			64.9937	0.3166	16.6244	0.4078	0	0.9786	0.1879	1.0124	2.2029	3.4554	4.1026	1.1451	4.5727						1.0732	0	0	0	0	0	1	2	0.06	0.4	0.014	1.6	0.0025	0.0025	412.205	1.03051	659.527	2.5	0.1	3.12	0.013	2.5	0	0	38131.8
889.63	2.8	-11.465	94.0738	0.969927			65.02	0.3147	16.6293	0.4027	0	0.963	0.1879	1.0114	2.196	3.4568	4.1042	1.1397	4.5743						1.0863	0	0	0	0	0	1	2	0.06	0.4	0.014	1.6	0.0025	0.0025	412.371	1.03093	659.793	2.5	0.1	3.12	0.013	2.5	0	0	38147.2
887.63	2.8	-11.501	94.0365	0.969542			65.0458	0.3129	16.6342	0.3976	0	0.9477	0.188	1.0104	2.1893	3.4581	4.1059	1.1344	4.5759						1.0991	0	0	0	0	0	1	2	0.06	0.4	0.014	1.6	0.0025	0.0025	412.534	1.03134	660.054	2.5	0.1	3.12	0.013	2.5	0	0	38162.3
885.63	2.8	-11.537	93.9997	0.969163			65.0713	0.311	16.6389	0.3926	0	0.9325	0.1881	1.0094	2.1827	3.4595	4.1075	1.1292	4.5774						1.1116	0	0	0	0	0	1	2	0.06	0.4	0.014	1.6	0.0025	0.0025	412.695	1.03174	660.312	2.5	0.1	3.12	0.013	2.5	0	0	38177.3
883.63	2.8	-11.573	93.9636	0.96879			65.0963	0.3092	16.6436	0.3877	0	0.9176	0.1882	1.0084	2.1762	3.4608	4.109	1.1241	4.579						1.1239	0	0	0	0	0	1	2	0.06	0.4	0.014	1.6	0.0025	0.0025	412.853	1.03213	660.565	2.5	0.1	3.12	0.013	2.5	0	0	38192
881.63	2.8	-11.609	93.928	0.968424			65.1209	0.3074	16.6482	0.3828	0	0.9029	0.1882	1.0074	2.1699	3.4621	4.1106	1.1191	4.5805						1.136	0	0	0	0	0	1	2	0.06	0.4	0.014	1.6	0.0025	0.0025	413.009	1.03252	660.815	2.5	0.1	3.12	0.013	2.5	0	0	38206.4
879.63	2.8	-11.645	93.893	0.968063			65.1452	0.3056	16.6528	0.378	0	0.8885	0.1883	1.0064	2.1637	3.4634	4.1121	1.1142	4.5819						1.1477	0	0	0	0	0	1	2	0.06	0.4	0.014	1.6	0.0025	0.0025	413.163	1.03291	661.06	2.5	0.1	3.12	0.013	2.5	0	0	38220.7
877.63	2.8	-11.682	93.8586	0.967708			65.1691	0.3038	16.6573	0.3732	0	0.8742	0.1884	1.0054	2.1576	3.4647	4.1136	1.1093	4.5834						1.1593	0	0	0	0	0	1	2	0.06	0.4	0.014	1.6	0.0025	0.0025	413.314	1.03328	661.302	2.5	0.1	3.12	0.013	2.5	0	0	38234.7
875.63	2.8	-11.718	93.8248	0.96736			65.1926	0.302	16.6617	0.3685	0	0.8601	0.1884	1.0045	2.1516	3.4659	4.1151	1.1046	4.5848						1.1706	0	0	0	0	0	1	2	0.06	0.4	0.014	1.6	0.0025	0.0025	413.462	1.03366	661.54	2.5	0.1	3.12	0.013	2.5	0	0	38248.4
873.63	2.8	-11.755	93.7916	0.967017			65.2157	0.3002	16.6661	0.3638	0	0.8463	0.1885	1.0035	2.1458	3.4672	4.1166	1.1	4.5862						1.1816	0	0	0	0	0	1	2	0.06	0.4	0.014	1.6	0.0025	0.0025	413.608	1.03402	661.774	2.5	0.1	3.12	0.013	2.5	0	0	38262
871.63	2.8	-11.792	93.7173	0.966251			65.2388	0.2985	16.6669	0.3592	0	0.8326	0.1887	1.003	2.14	3.466	4.1196	1.097	4.5897		0.0431				1.1902	0	0.0349469	0	0	0	0.965053	2	0.06	0.4	0.014	1.6	0.0025	0.00450945	413.907	1.86649	662.251	2.5	0.1	3.12	0.013	2.5	0	0.00349469	38287.7
869.63	2.8	-11.829	93.2831	0.961775			65.2647	0.2966	16.6381	0.3542	0	0.8182	0.1895	1.0059	2.1338	3.4443	4.1363	1.107	4.6113		0.4596				1.1796	0	0.280381	0	0	0	0.719619	2	0.06	0.4	0.014	1.6	0.0025	0.0186219	415.596	7.73918	664.954	2.5	0.1	3.12	0.013	2.5	0	0.0280381	38428.5
867.63	2.8	-11.866	92.85	0.957309			65.2894	0.2948	16.6095	0.3492	0	0.8041	0.1904	1.0089	2.1283	3.4221	4.1532	1.1171	4.633		0.876				1.1686	0	0.428446	0	0	0	0.571554	2	0.06	0.4	0.014	1.6	0.0025	0.0271356	417.344	11.3249	667.75	2.5	0.1	3.12	0.013	2.5	0	0.0428446	38577.8
865.63	2.8	-11.903	92.2833	0.951466			65.3125	0.2948	16.5998	0.3442	0	0.7901	0.1916	0.9811	2.1203	3.4022	4.176	1.1259	4.6615		1.3121				1.1645	0	0.529799	0	0	0	0.470201	2	0.06	0.4	0.014	1.6	0.0025	0.0329634	419.715	13.8352	671.544	2.5	0.1	3.12	0.013	2.5	0	0.0529799	38785
863.63	2.8	-11.94	91.8022	0.946506			65.3346	0.2936	16.5787	0.3394	0	0.7763	0.1926	0.9724	2.1151	3.38	4.1952	1.136	4.6861		1.7352				1.1554	0	0.600291	0	0	0	0.399709	2	0.06	0.4	0.014	1.6	0.0025	0.0370167	421.748	15.6117	674.796	2.5	0.1	3.12	0.013	2.5	0	0.0600291	38962.3
861.63	2.8	-11.978	91.3235	0.941571			65.3556	0.2925	16.5576	0.3346	0	0.7628	0.1936	0.9638	2.1107	3.3573	4.2144	1.1463	4.7109		2.1575				1.146	0	0.653095	0	0	0	0.346905	2	0.06	0.4	0.014	1.6	0.0025	0.040053	423.799	16.9744	678.078	2.5	0.1	3.12	0.013	2.5	0	0.0653095	39141.8
859.63	2.8	-12.015	90.8472	0.93666			65.3754	0.2914	16.5366	0.3298	0	0.7495	0.1946	0.9553	2.1071	3.334	4.2336	1.1569	4.7358		2.5791				1.1361	0	0.694202	0	0	0	0.305798	2	0.06	0.4	0.014	1.6	0.0025	0.0424166	425.866	18.0638	681.385	2.5	0.1	3.12	0.013	2.5	0	0.0694202	39323
857.63	2.8	-12.053	90.3734	0.931774			65.3939	0.2903	16.5158	0.3251	0	0.7363	0.1956	0.947	2.1043	3.3101	4.2529	1.1678	4.7608		2.9998				1.1258	0	0.727118	0	0	0	0.272882	2	0.06	0.4	0.014	1.6	0.0025	0.0443093	427.946	18.962	684.714	2.5	0.1	3.12	0.013	2.5	0	0.0727118	39505.7
855.63	2.8	-12.091	89.9021	0.926915			65.4114	0.2892	16.4949	0.3205	0	0.7234	0.1967	0.9388	2.1022	3.2858	4.2722	1.179	4.786		3.4195				1.1151	0	0.754091	0	0	0	0.245909	2	0.06	0.4	0.014	1.6	0.0025	0.0458602	430.04	19.7217	688.063	2.5	0.1	3.12	0.013	2.5	0	0.0754091	39689.6
853.63	2.8	-12.129	89.4334	0.922083			65.4276	0.2881	16.4742	0.3159	0	0.7107	0.1977	0.9307	2.1009	3.2609	4.2915	1.1905	4.8113		3.8381				1.1039	0	0.776629	0	0	0	0.223371	2	0.06	0.4	0.014	1.6	0.0025	0.0471562	432.144	20.3783	691.431	2.5	0.1	3.12	0.013	2.5	0	0.0776629	39874.5
851.63	2.8	-12.167	88.9673	0.917278			65.4428	0.2871	16.4535	0.3114	0	0.6981	0.1987	0.9227	2.1003	3.2356	4.3109	1.2022	4.8367		4.2556				1.0923	0	0.795752	0	0	0	0.204248	2	0.06	0.4	0.014	1.6	0.0025	0.0482557	434.26	20.9555	694.815	2.5	0.1	3.12	0.013	2.5	0	0.0795752	40060.5
849.63	2.8	-12.205	88.5041	0.912502			65.4567	0.286	16.4329	0.3069	0	0.6858	0.1998	0.9148	2.1005	3.2098	4.3302	1.2143	4.8623		4.6719				1.0803	0	0.812194	0	0	0	0.187806	2	0.06	0.4	0.014	1.6	0.0025	0.0492011	436.385	21.4706	698.216	2.5	0.1	3.12	0.013	2.5	0	0.0812194	40247.4
847.63	2.8	-12.243	88.0436	0.907754			65.4696	0.2849	16.4123	0.3025	0	0.6736	0.2008	0.907	2.1014	3.1836	4.3496	1.2266	4.888		5.0869				1.0678	0	0.826507	0	0	0	0.173493	2	0.06	0.4	0.014	1.6	0.0025	0.0500241	438.52	21.9366	701.632	2.5	0.1	3.12	0.013	2.5	0	0.0826507	40435.2
845.63	2.8	-12.282	87.5861	0.903037			65.4813	0.2839	16.3917	0.2982	0	0.6617	0.2019	0.8994	2.1031	3.1568	4.3689	1.2393	4.9138		5.5004				1.055	0	0.839064	0	0	0	0.160936	2	0.06	0.4	0.014	1.6	0.0025	0.0507462	440.663	22.362	705.061	2.5	0.1	3.12	0.013	2.5	0	0.0839064	40623.7
843.63	2.8	-12.32	87.0859	0.897879			65.5322	0.2818	16.3559	0.2946	0	0.6518	0.203	0.8903	2.1046	3.1281	4.3713	1.2516	4.9349	0.1482	5.943				1.0443	0.0207694	0.832878	0	0	0	0.146353	2	0.06	0.4	0.014	1.6	0.0025	0.0918773	441.107	40.5277	705.771	2.5	0.1	3.12	0.013	2.5	0	0.135211	40612.4
841.63	2.8	-12.359	86.5334	0.892183			65.6346	0.2783	16.3002	0.2919	0	0.6445	0.2043	0.8794	2.1054	3.0969	4.3517	1.2632	4.9497	0.4857	6.4209				1.037	0.0611436	0.808311	0	0	0	0.130545	2	0.06	0.4	0.014	1.6	0.0025	0.171112	439.671	75.2331	703.474	2.5	0.1	3.12	0.013	2.5	0	0.23369	40380.3
839.63	2.8	-12.398	86.0019	0.886704			65.7057	0.2759	16.2591	0.2887	0	0.6358	0.2056	0.8649	2.1072	3.067	4.3457	1.2752	4.9693	0.7095	6.8738				1.0284	0.0823879	0.798193	0	0	0	0.119419	2	0.06	0.4	0.014	1.6	0.0025	0.212966	439.704	93.6419	703.526	2.5	0.1	3.12	0.013	2.5	0	0.285789	40318
837.63	2.8	-12.437	85.4934	0.881461			65.7364	0.2749	16.2368	0.2849	0	0.6254	0.2068	0.8459	2.11	3.0387	4.3573	1.2879	4.995	0.7899	7.2982				1.0182	0.0867421	0.801445	0	0	0	0.111813	2	0.06	0.4	0.014	1.6	0.0025	0.221851	441.266	97.895	706.025	2.5	0.1	3.12	0.013	2.5	0	0.297	40431.9
835.63	2.8	-12.476	84.9914	0.876284			65.7656	0.2739	16.2146	0.2811	0	0.6151	0.208	0.8274	2.1135	3.01	4.369	1.3008	5.0207	0.8681	7.7191				1.0074	0.090478	0.804525	0	0	0	0.104997	2	0.06	0.4	0.014	1.6	0.0025	0.22949	442.846	101.629	708.553	2.5	0.1	3.12	0.013	2.5	0	0.306647	40548
833.63	2.8	-12.516	84.4957	0.871174			65.7935	0.2729	16.1924	0.2774	0	0.605	0.2092	0.8093	2.1178	2.981	4.3808	1.3141	5.0465	0.9443	8.1366				0.9962	0.0937075	0.807435	0	0	0	0.0988578	2	0.06	0.4	0.014	1.6	0.0025	0.236108	444.44	104.936	711.105	2.5	0.1	3.12	0.013	2.5	0	0.315012	40665.8
831.63	2.8	-12.555	84.0064	0.866129			65.8201	0.2719	16.1701	0.2737	0	0.595	0.2105	0.7917	2.1228	2.9516	4.3927	1.3276	5.0724	1.0183	8.5506				0.9845	0.0964902	0.810222	0	0	0	0.0932875	2	0.06	0.4	0.014	1.6	0.0025	0.241827	446.05	107.867	713.68	2.5	0.1	3.12	0.013	2.5	0	0.322248	40785.5
829.63	2.8	-12.595	83.5234	0.861149			65.8453	0.2709	16.1479	0.2701	0	0.5851	0.2117	0.7744	2.1284	2.9218	4.4047	1.3415	5.0983	1.0904	8.961				0.9723	0.0989142	0.812885	0	0	0	0.0882009	2	0.06	0.4	0.014	1.6	0.0025	0.246822	447.669	110.495	716.271	2.5	0.1	3.12	0.013	2.5	0	0.328574	40906.4
827.63	2.8	-12.634	83.0468	0.856235			65.8691	0.2699	16.1257	0.2665	0	0.5754	0.2129	0.7574	2.1348	2.8918	4.4166	1.3557	5.1242	1.1606	9.3678				0.9595	0.101028	0.815449	0	0	0	0.0835227	2	0.06	0.4	0.014	1.6	0.0025	0.251192	449.298	112.86	718.877	2.5	0.1	3.12	0.013	2.5	0	0.334115	41028.6
825.63	2.8	-12.674	82.5764	0.851386			65.8917	0.2688	16.1035	0.2629	0	0.5658	0.2141	0.7409	2.1419	2.8615	4.4287	1.3702	5.1501	1.2289	9.771				0.9463	0.10287	0.817917	0	0	0	0.0792135	2	0.06	0.4	0.014	1.6	0.0025	0.255012	450.936	114.994	721.498	2.5	0.1	3.12	0.013	2.5	0	0.338966	41152
823.63	2.8	-12.714	82.1124	0.846601			65.9129	0.2678	16.0813	0.2594	0	0.5563	0.2153	0.7247	2.1496	2.8308	4.4407	1.3851	5.176	1.2954	10.1706				0.9326	0.10448	0.820302	0	0	0	0.0752182	2	0.06	0.4	0.014	1.6	0.0025	0.258365	452.581	116.931	724.129	2.5	0.1	3.12	0.013	2.5	0	0.343229	41276.2
821.63	2.8	-12.755	81.6545	0.841881			65.9329	0.2668	16.059	0.2559	0	0.5469	0.2165	0.7089	2.158	2.7999	4.4528	1.4003	5.2019	1.3601	10.5665				0.9183	0.105886	0.822622	0	0	0	0.0714914	2	0.06	0.4	0.014	1.6	0.0025	0.261309	454.231	118.695	726.769	2.5	0.1	3.12	0.013	2.5	0	0.346978	41401.4
819.63	2.8	-12.795	81.2029	0.837225			65.9516	0.2658	16.0368	0.2525	0	0.5377	0.2177	0.6935	2.1672	2.7688	4.465	1.4158	5.2278	1.4231	10.9586				0.9035	0.107119	0.824873	0	0	0	0.068008	2	0.06	0.4	0.014	1.6	0.0025	0.263901	455.886	120.309	729.417	2.5	0.1	3.12	0.013	2.5	0	0.350285	41527.2
817.63	2.8	-12.835	80.7575	0.832632			65.969	0.2648	16.0145	0.2491	0	0.5286	0.2189	0.6784	2.177	2.7374	4.4771	1.4316	5.2537	1.4845	11.3471				0.8882	0.108201	0.82706	0	0	0	0.0647386	2	0.06	0.4	0.014	1.6	0.0025	0.266188	457.543	121.793	732.069	2.5	0.1	3.12	0.013	2.5	0	0.353209	41653.5
815.63	2.8	-12.876	80.3183	0.828104			65.9852	0.2638	15.9921	0.2457	0	0.5196	0.2201	0.6636	2.1874	2.7058	4.4893	1.4478	5.2796	1.5442	11.7318				0.8723	0.109144	0.829202	0	0	0	0.0616541	2	0.06	0.4	0.014	1.6	0.0025	0.268194	459.204	123.156	734.727	2.5	0.1	3.12	0.013	2.5	0	0.35578	41780.5
813.63	2.8	-12.917	79.8852	0.823638			66.0001	0.2627	15.9697	0.2424	0	0.5107	0.2213	0.6491	2.1986	2.6741	4.5015	1.4644	5.3055	1.6024	12.1128				0.8559	0.109971	0.831289	0	0	0	0.0587396	2	0.06	0.4	0.014	1.6	0.0025	0.269966	460.867	124.418	737.386	2.5	0.1	3.12	0.013	2.5	0	0.358057	41907.7
811.63	2.8	-12.958	79.4582	0.819236			66.0138	0.2617	15.9473	0.2391	0	0.5019	0.2225	0.635	2.2104	2.6421	4.5137	1.4813	5.3313	1.659	12.4899				0.8389	0.11069	0.833338	0	0	0	0.0559722	2	0.06	0.4	0.014	1.6	0.0025	0.27152	462.53	125.586	740.048	2.5	0.1	3.12	0.013	2.5	0	0.360059	42035.4
809.63	2.8	-12.999	79.0207	0.814725			66.0365	0.25	15.9215	0.2373	0	0.4964	0.2228	0.6208	2.2219	2.61	4.5267	1.4979	5.3581	1.7141	12.8678				0.8232	0.111268	0.835295	0	0	0	0.0534368	2	0.06	0.4	0.014	1.6	0.0025	0.272788	464.273	126.648	742.837	2.5	0.1	3.12	0.013	2.5	0	0.3617	42170
807.63	2.8	-13.04	78.6024	0.810413			66.05	0.2467	15.8982	0.2344	0	0.4886	0.2238	0.6072	2.2349	2.5778	4.539	1.5154	5.3841	1.7677	13.2382				0.8055	0.111799	0.837257	0	0	0	0.0509443	2	0.06	0.4	0.014	1.6	0.0025	0.273961	465.954	127.653	745.526	2.5	0.1	3.12	0.013	2.5	0	0.363223	42299.5
805.63	2.8	-13.082	78.1902	0.806163			66.0623	0.2434	15.8748	0.2316	0	0.4808	0.2247	0.5939	2.2485	2.5453	4.5514	1.5333	5.4101	1.8199	13.6048				0.7873	0.112256	0.839181	0	0	0	0.0485628	2	0.06	0.4	0.014	1.6	0.0025	0.274985	467.633	128.592	748.212	2.5	0.1	3.12	0.013	2.5	0	0.364559	42429.2
803.63	2.8	-13.123	77.7842	0.801976			66.0733	0.2401	15.8513	0.2287	0	0.4731	0.2257	0.5809	2.2628	2.5128	4.5637	1.5516	5.4359	1.8707	13.9675				0.7684	0.112648	0.841081	0	0	0	0.0462708	2	0.06	0.4	0.014	1.6	0.0025	0.275877	469.309	129.471	750.894	2.5	0.1	3.12	0.013	2.5	0	0.365728	42558.8
801.63	2.8	-13.165	77.3842	0.797852			66.0832	0.2369	15.8278	0.2259	0	0.4655	0.2266	0.5682	2.2778	2.4801	4.576	1.5703	5.4617	1.9202	14.3263				0.749	0.112983	0.842947	0	0	0	0.0440705	2	0.06	0.4	0.014	1.6	0.0025	0.276653	470.982	130.298	753.571	2.5	0.1	3.12	0.013	2.5	0	0.366752	42688.3
799.63	2.8	-13.207	76.9902	0.79379			66.0917	0.2337	15.8041	0.2231	0	0.458	0.2276	0.5557	2.2935	2.4474	4.5883	1.5894	5.4874	1.9685	14.6813				0.7289	0.113271	0.844787	0	0	0	0.0419421	2	0.06	0.4	0.014	1.6	0.0025	0.277334	472.65	131.082	756.239	2.5	0.1	3.12	0.013	2.5	0	0.367656	42817.6
797.63	2.8	-13.249	76.6022	0.78979			66.0991	0.2306	15.7804	0.2204	0	0.4505	0.2285	0.5436	2.3099	2.4146	4.6005	1.6089	5.5131	2.0154	15.0324				0.7082	0.113505	0.84661	0	0	0	0.0398851	2	0.06	0.4	0.014	1.6	0.0025	0.277907	474.314	131.815	758.903	2.5	0.1	3.12	0.013	2.5	0	0.368424	42946.8
795.63	2.8	-13.291	76.2202	0.785851			66.1053	0.2275	15.7565	0.2177	0	0.4432	0.2295	0.5317	2.3269	2.3816	4.6127	1.6288	5.5386	2.0612	15.3796				0.6869	0.113704	0.848403	0	0	0	0.0378923	2	0.06	0.4	0.014	1.6	0.0025	0.278408	475.972	132.514	761.556	2.5	0.1	3.12	0.013	2.5	0	0.369101	43075.6
793.63	2.8	-13.333	75.844	0.781973			66.1102	0.2244	15.7326	0.215	0	0.436	0.2304	0.5201	2.3446	2.3487	4.6248	1.6492	5.5641	2.1058	15.723				0.6649	0.113866	0.850181	0	0	0	0.0359528	2	0.06	0.4	0.014	1.6	0.0025	0.278832	477.625	133.177	764.199	2.5	0.1	3.12	0.013	2.5	0	0.369683	43204.1
791.63	2.8	-13.376	75.4738	0.778156			66.1138	0.2214	15.7085	0.2123	0	0.4288	0.2313	0.5087	2.3631	2.3157	4.6369	1.67	5.5894	2.1492	16.0625				0.6422	0.113992	0.851946	0	0	0	0.0340619	2	0.06	0.4	0.014	1.6	0.0025	0.279187	479.27	133.806	766.833	2.5	0.1	3.12	0.013	2.5	0	0.370175	43332.2
789.63	2.8	-13.418	75.1094	0.774399			66.1163	0.2184	15.6843	0.2097	0	0.4217	0.2323	0.4976	2.3822	2.2826	4.6489	1.6912	5.6147	2.1916	16.3982				0.6189	0.114094	0.853686	0	0	0	0.0322198	2	0.06	0.4	0.014	1.6	0.0025	0.27949	480.908	134.409	769.453	2.5	0.1	3.12	0.013	2.5	0	0.370604	43459.7
787.63	2.8	-13.461	74.7509	0.770702			66.1175	0.2155	15.66	0.207	0	0.4148	0.2332	0.4868	2.4021	2.2495	4.6609	1.7129	5.6398	2.2328	16.7301				0.5949	0.114164	0.855418	0	0	0	0.0304175	2	0.06	0.4	0.014	1.6	0.0025	0.279729	482.539	134.98	772.062	2.5	0.1	3.12	0.013	2.5	0	0.370952	43586.8
785.63	2.8	-13.504	74.3981	0.767065			66.1174	0.2125	15.6355	0.2045	0	0.4079	0.2341	0.4762	2.4227	2.2165	4.6728	1.7352	5.6648	2.2731	17.0582				0.5702	0.114218	0.857131	0	0	0	0.0286511	2	0.06	0.4	0.014	1.6	0.0025	0.279935	484.159	135.533	774.655	2.5	0.1	3.12	0.013	2.5	0	0.371257	43713.2
783.63	2.8	-13.547	74.0511	0.763487			66.1161	0.2096	15.6109	0.2019	0	0.4011	0.235	0.4658	2.444	2.1834	4.6846	1.7578	5.6897	2.3123	17.3825				0.5447	0.114247	0.85884	0	0	0	0.0269127	2	0.06	0.4	0.014	1.6	0.0025	0.280091	485.771	136.06	777.234	2.5	0.1	3.12	0.013	2.5	0	0.371501	43839
781.63	2.8	-13.591	73.7098	0.759968			66.1136	0.2068	15.5862	0.1994	0	0.3943	0.2359	0.4556	2.466	2.1503	4.6964	1.781	5.7145	2.3505	17.703				0.5186	0.114257	0.860534	0	0	0	0.0252089	2	0.06	0.4	0.014	1.6	0.0025	0.280208	487.374	136.566	779.799	2.5	0.1	3.12	0.013	2.5	0	0.371695	43964.1
779.63	2.8	-13.634	73.3742	0.756508			66.1097	0.2039	15.5613	0.1969	0	0.3877	0.2368	0.4457	2.4888	2.1173	4.708	1.8048	5.7391	2.3878	18.0197				0.4916	0.114254	0.862224	0	0	0	0.0235225	2	0.06	0.4	0.014	1.6	0.0025	0.2803	488.965	137.057	782.344	2.5	0.1	3.12	0.013	2.5	0	0.371857	44088.4
777.63	2.8	-13.678	73.0442	0.753106			66.1046	0.2011	15.5362	0.1944	0	0.3812	0.2376	0.436	2.5124	2.0843	4.7196	1.829	5.7636	2.4242	18.3327				0.4639	0.114237	0.863902	0	0	0	0.0218606	2	0.06	0.4	0.014	1.6	0.0025	0.280363	490.545	137.531	784.872	2.5	0.1	3.12	0.013	2.5	0	0.371983	44211.8
775.63	2.8	-13.721	72.7198	0.749762			66.0982	0.1984	15.511	0.192	0	0.3747	0.2385	0.4265	2.5367	2.0513	4.731	1.8538	5.7879	2.4597	18.642				0.4354	0.114208	0.865576	0	0	0	0.0202163	2	0.06	0.4	0.014	1.6	0.0025	0.2804	492.113	137.989	787.382	2.5	0.1	3.12	0.013	2.5	0	0.372077	44334.4
773.63	2.8	-13.765	72.4011	0.746475			66.0905	0.1957	15.4856	0.1896	0	0.3683	0.2394	0.4172	2.5619	2.0184	4.7424	1.8791	5.812	2.4943	18.9476				0.406	0.114167	0.86725	0	0	0	0.018583	2	0.06	0.4	0.014	1.6	0.0025	0.280415	493.67	138.432	789.871	2.5	0.1	3.12	0.013	2.5	0	0.372141	44456
771.63	2.8	-13.81	72.0878	0.743246			66.0815	0.193	15.46	0.1872	0	0.362	0.2402	0.4081	2.5878	1.9856	4.7537	1.905	5.836	2.5281	19.2495				0.3759	0.114117	0.868915	0	0	0	0.016968	2	0.06	0.4	0.014	1.6	0.0025	0.280412	495.213	138.864	792.34	2.5	0.1	3.12	0.013	2.5	0	0.372185	44576.6
769.63	2.8	-13.854	71.7802	0.740073			66.0711	0.1903	15.4342	0.1848	0	0.3558	0.2411	0.3992	2.6145	1.9528	4.7648	1.9315	5.8598	2.5611	19.5478				0.3448	0.114061	0.870583	0	0	0	0.015356	2	0.06	0.4	0.014	1.6	0.0025	0.280396	496.741	139.284	794.786	2.5	0.1	3.12	0.013	2.5	0	0.372212	44696.1
767.63	2.8	-13.898	71.478	0.736958			66.0594	0.1876	15.4082	0.1825	0	0.3497	0.2419	0.3905	2.6421	1.9201	4.7758	1.9586	5.8835	2.5933	19.8424				0.3129	0.113998	0.872247	0	0	0	0.0137547	2	0.06	0.4	0.014	1.6	0.0025	0.280366	498.256	139.694	797.21	2.5	0.1	3.12	0.013	2.5	0	0.37222	44814.5
765.63	2.8	-13.943	71.1812	0.733898			66.0463	0.185	15.382	0.1802	0	0.3436	0.2427	0.382	2.6705	1.8875	4.7867	1.9863	5.9069	2.6247	20.1334				0.2801	0.113928	0.873914	0	0	0	0.0121581	2	0.06	0.4	0.014	1.6	0.0025	0.280322	499.757	140.093	799.611	2.5	0.1	3.12	0.013	2.5	0	0.372212	44931.8
763.63	2.8	-13.988	70.89	0.730895			66.0319	0.1824	15.3556	0.1779	0	0.3376	0.2435	0.3737	2.6998	1.855	4.7975	2.0146	5.9302	2.6554	20.4208				0.2463	0.113856	0.875584	0	0	0	0.0105606	2	0.06	0.4	0.014	1.6	0.0025	0.280273	501.242	140.484	801.987	2.5	0.1	3.12	0.013	2.5	0	0.372198	45047.8
761.63	2.8	-14.033	70.6041	0.727948			66.016	0.1799	15.329	0.1757	0	0.3317	0.2444	0.3656	2.7299	1.8227	4.8081	2.0437	5.9533	2.6854	20.7047				0.2116	0.11378	0.877255	0	0	0	0.00896546	2	0.06	0.4	0.014	1.6	0.0025	0.280218	502.71	140.868	804.337	2.5	0.1	3.12	0.013	2.5	0	0.372175	45162.6
759.63	2.8	-14.078	70.3187	0.725006			66.0091	0.1775	15.3011	0.1734	0	0.3259	0.2452	0.3577	2.759	1.7882	4.8194	2.0714	5.9722	2.7146	20.9445				0.1794	0.113875	0.8786	0	0	0	0.00752564	2	0.06	0.4	0.014	1.6	0.0025	0.280484	504.135	141.402	806.616	2.5	0.1	3.12	0.013	2.5	0	0.372547	45272.1
757.63	2.8	-14.123	70.0196	0.721922			66.0457	0.1756	15.2689	0.171	0	0.32	0.246	0.3501	2.7803	1.7443	4.8338	2.0909	5.9733	2.7433	21.0038				0.1617	0.11474	0.878497	0	0	0	0.0067632	2	0.06	0.4	0.014	1.6	0.0025	0.282207	505.4	142.627	808.639	2.5	0.1	3.12	0.013	2.5	0	0.3747	45361.5
755.63	2.8	-14.169	69.7292	0.718927			66.0812	0.1737	15.2368	0.1687	0	0.3142	0.2469	0.3426	2.802	1.7012	4.8478	2.1108	5.9741	2.7714	21.0599				0.1434	0.115597	0.878422	0	0	0	0.00598131	2	0.06	0.4	0.014	1.6	0.0025	0.283914	506.624	143.838	810.599	2.5	0.1	3.12	0.013	2.5	0	0.376834	45447.6
753.63	2.8	-14.214	69.4471	0.716019			66.1156	0.1718	15.2049	0.1663	0	0.3084	0.2477	0.3353	2.824	1.6588	4.8616	2.1309	5.9746	2.7988	21.1129				0.1244	0.116442	0.878383	0	0	0	0.00517555	2	0.06	0.4	0.014	1.6	0.0025	0.285599	507.811	145.03	812.497	2.5	0.1	3.12	0.013	2.5	0	0.378942	45530.4
751.63	2.8	-14.26	69.1734	0.713197			66.1487	0.1699	15.1732	0.164	0	0.3028	0.2485	0.3281	2.8464	1.6171	4.875	2.1513	5.9748	2.8256	21.1629				0.1048	0.117277	0.878373	0	0	0	0.00434976	2	0.06	0.4	0.014	1.6	0.0025	0.287268	508.959	146.208	814.334	2.5	0.1	3.12	0.013	2.5	0	0.381031	45610.1
749.63	2.8	-14.306	68.9077	0.710457			66.1807	0.1681	15.1416	0.1618	0	0.2972	0.2493	0.3211	2.8691	1.5761	4.8882	2.1721	5.9747	2.8518	21.2098				0.0846	0.118106	0.878391	0	0	0	0.00350366	2	0.06	0.4	0.014	1.6	0.0025	0.288923	510.068	147.37	816.108	2.5	0.1	3.12	0.013	2.5	0	0.383103	45686.5
747.63	2.8	-14.353	68.6499	0.707799			66.2115	0.1662	15.1102	0.1595	0	0.2918	0.2501	0.3142	2.8923	1.5359	4.901	2.1932	5.9742	2.8774	21.2539				0.0637	0.118925	0.878442	0	0	0	0.00263278	2	0.06	0.4	0.014	1.6	0.0025	0.290564	511.139	148.519	817.823	2.5	0.1	3.12	0.013	2.5	0	0.385158	45759.7
745.63	2.8	-14.399	68.3998	0.705221			66.241	0.1644	15.0789	0.1573	0	0.2864	0.2508	0.3074	2.9159	1.4963	4.9135	2.2146	5.9735	2.9025	21.2951				0.0421	0.119742	0.878522	0	0	0	0.00173682	2	0.06	0.4	0.014	1.6	0.0025	0.292199	512.172	149.656	819.475	2.5	0.1	3.12	0.013	2.5	0	0.387206	45829.7
743.63	2.8	-14.446	68.1573	0.70272			66.2693	0.1625	15.0478	0.1552	0	0.2811	0.2515	0.3008	2.9398	1.4575	4.9258	2.2363	5.9724	2.927	21.3336				0.0198	0.12055	0.878635	0	0	0	0.000815473	2	0.06	0.4	0.014	1.6	0.0025	0.29382	513.167	150.779	821.068	2.5	0.1	3.12	0.013	2.5	0	0.389238	45896.7
741.63	2.8	-14.492	67.9202	0.700276			66.2997	0.1607	15.0177	0.153	0	0.2759	0.2522	0.2942	2.9619	1.4194	4.9378	2.2565	5.9709	2.9511	21.366					0.121359	0.878641	0	0	0	0	2	0.06	0.4	0.014	1.6	0.0025	0.295437	514.136	151.894	822.617	2.5	0.1	3.12	0.013	2.5	0	0.391262	45961.3
739.63	2.8	-14.539	67.6779	0.697778			66.3501	0.1589	14.9933	0.1509	0	0.2708	0.253	0.2877	2.9696	1.3824	4.9505	2.2646	5.9683	2.9752	21.3747					0.122185	0.877815	0	0	0	0	2	0.06	0.4	0.014	1.6	0.0025	0.297039	515.135	153.015	824.215	2.5	0.1	3.12	0.013	2.5	0	0.393245	46028.5
737.63	2.8	-14.587	67.4423	0.695349			66.4002	0.1571	14.9694	0.1488	0	0.2659	0.2537	0.2813	2.977	1.346	4.9629	2.2725	5.9653	2.9988	21.38					0.123009	0.876991	0	0	0	0	2	0.06	0.4	0.014	1.6	0.0025	0.298637	516.099	154.126	825.759	2.5	0.1	3.12	0.013	2.5	0	0.39522	46092.9
735.63	2.8	-14.634	67.2132	0.692986			66.45	0.1554	14.9458	0.1467	0	0.261	0.2543	0.275	2.9843	1.3104	4.9751	2.2802	5.9619	3.022	21.3819					0.123833	0.876167	0	0	0	0	2	0.06	0.4	0.014	1.6	0.0025	0.300235	517.029	155.231	827.247	2.5	0.1	3.12	0.013	2.5	0	0.397198	46154.4
733.63	2.8	-14.681	66.9904	0.69069			66.4995	0.1536	14.9225	0.1447	0	0.2562	0.255	0.2688	2.9913	1.2754	4.987	2.2878	5.9583	3.0447	21.3805					0.124654	0.875346	0	0	0	0	2	0.06	0.4	0.014	1.6	0.0025	0.301829	517.926	156.325	828.682	2.5	0.1	3.12	0.013	2.5	0	0.39917	46213.1
731.63	2.8	-14.729	66.7739	0.688457			66.5486	0.1519	14.8996	0.1427	0	0.2515	0.2557	0.2627	2.9982	1.2411	4.9986	2.2952	5.9542	3.0669	21.3759					0.125473	0.874527	0	0	0	0	2	0.06	0.4	0.014	1.6	0.0025	0.303417	518.791	157.41	830.065	2.5	0.1	3.12	0.013	2.5	0	0.401134	46269.2
729.63	2.8	-14.777	66.5634	0.686287			66.5975	0.1501	14.877	0.1407	0	0.2468	0.2563	0.2568	3.0049	1.2075	5.01	2.3025	5.9499	3.0887	21.3681					0.126292	0.873708	0	0	0	0	2	0.06	0.4	0.014	1.6	0.0025	0.305007	519.622	158.488	831.395	2.5	0.1	3.12	0.013	2.5	0	0.403101	46322.4
727.63	2.8	-14.825	66.3589	0.684178			66.6461	0.1484	14.8548	0.1387	0	0.2422	0.2569	0.2509	3.0115	1.1745	5.0212	2.3096	5.9452	3.1101	21.3572					0.127113	0.872887	0	0	0	0	2	0.06	0.4	0.014	1.6	0.0025	0.306598	520.42	159.56	832.672	2.5	0.1	3.12	0.013	2.5	0	0.40507	46372.9
725.63	2.8	-14.873	66.1601	0.682129			66.6943	0.1467	14.8329	0.1368	0	0.2377	0.2575	0.2452	3.0178	1.1421	5.0321	2.3165	5.9402	3.1311	21.3432					0.127934	0.872066	0	0	0	0	2	0.06	0.4	0.014	1.6	0.0025	0.308192	521.186	160.625	833.897	2.5	0.1	3.12	0.013	2.5	0	0.407042	46420.7
723.63	2.8	-14.922	65.967	0.680138			66.7423	0.145	14.8114	0.1349	0	0.2333	0.258	0.2396	3.024	1.1105	5.0428	2.3233	5.9349	3.1517	21.3262					0.128757	0.871243	0	0	0	0	2	0.06	0.4	0.014	1.6	0.0025	0.309789	521.92	161.685	835.071	2.5	0.1	3.12	0.013	2.5	0	0.409017	46465.9
721.63	2.8	-14.971	65.7794	0.678203			66.79	0.1433	14.7902	0.133	0	0.229	0.2586	0.2341	3.03	1.0794	5.0533	2.3299	5.9292	3.1719	21.3062					0.129581	0.870419	0	0	0	0	2	0.06	0.4	0.014	1.6	0.0025	0.311387	522.622	162.738	836.195	2.5	0.1	3.12	0.013	2.5	0	0.410995	46508.4
719.63	2.8	-15.019	65.5972	0.676325			66.8374	0.1416	14.7693	0.1312	0	0.2247	0.2591	0.2287	3.0359	1.049	5.0635	2.3364	5.9232	3.1918	21.2833					0.13041	0.86959	0	0	0	0	2	0.06	0.4	0.014	1.6	0.0025	0.312996	523.292	163.788	837.267	2.5	0.1	3.12	0.013	2.5	0	0.412984	46548.2
717.63	2.8	-15.069	65.4202	0.674501			66.8844	0.14	14.7488	0.1294	0	0.2205	0.2596	0.2234	3.0416	1.0192	5.0735	2.3427	5.9169	3.2113	21.2576					0.13124	0.86876	0	0	0	0	2	0.06	0.4	0.014	1.6	0.0025	0.314606	523.932	164.832	838.29	2.5	0.1	3.12	0.013	2.5	0	0.414976	46585.5
715.63	2.8	-15.118	65.2484	0.672729			66.9313	0.1383	14.7286	0.1276	0	0.2164	0.2601	0.2182	3.0471	0.9901	5.0832	2.3489	5.9103	3.2305	21.2291					0.132075	0.867925	0	0	0	0	2	0.06	0.4	0.014	1.6	0.0025	0.316225	524.54	165.873	839.263	2.5	0.1	3.12	0.013	2.5	0	0.41698	46620.2
713.63	2.8	-15.167	65.0817	0.67101			66.9778	0.1367	14.7087	0.1258	0	0.2123	0.2606	0.2132	3.0524	0.9616	5.0927	2.3549	5.9034	3.2494	21.1978					0.132915	0.867085	0	0	0	0	2	0.06	0.4	0.014	1.6	0.0025	0.317855	525.117	166.911	840.187	2.5	0.1	3.12	0.013	2.5	0	0.418996	46652.3
711.63	2.8	-15.217	64.9199	0.669342			67.024	0.1351	14.6891	0.1241	0	0.2083	0.2611	0.2082	3.0576	0.9336	5.102	2.3608	5.8963	3.2679	21.1639					0.133756	0.866244	0	0	0	0	2	0.06	0.4	0.014	1.6	0.0025	0.319487	525.665	167.943	841.064	2.5	0.1	3.12	0.013	2.5	0	0.421014	46682
709.63	2.8	-15.267	64.7628	0.667723			67.0699	0.1335	14.6698	0.1224	0	0.2044	0.2615	0.2033	3.0626	0.9063	5.1111	2.3665	5.8888	3.2861	21.1274					0.134602	0.865398	0	0	0	0	2	0.06	0.4	0.014	1.6	0.0025	0.321127	526.183	168.972	841.893	2.5	0.1	3.12	0.013	2.5	0	0.423044	46709.2
707.63	2.8	-15.317	64.0851	0.660735			66.9544	0.1324	14.7368	0.1199	0	0.199	0.264	0.1961	3.0928	0.8662	5.1648	2.3915	5.8821	3.3143	20.705		0.4956			0.135195	0.844588	0	0.0202163	0	0	2	0.06	0.4	0.014	1.6	0.0025	0.321349	529.906	170.285	847.849	2.5	0.1	3.12	0.013	2.5	0	0.42271	47000
705.63	2.8	-15.367	63.3238	0.652885			66.804	0.1314	14.8223	0.1173	0	0.1935	0.2668	0.1887	3.1277	0.8248	5.2273	2.4203	5.8759	3.3435	20.2165		1.0802			0.135693	0.820468	0	0.0438389	0	0	2	0.06	0.4	0.014	1.6	0.0025	0.321228	534.249	171.615	854.798	2.5	0.1	3.12	0.013	2.5	0	0.421849	47342.8
703.63	2.8	-15.418	62.5993	0.645416			66.6554	0.1304	14.9067	0.1148	0	0.1882	0.2696	0.1816	3.1617	0.7852	5.2883	2.4483	5.8699	3.3715	19.75		1.64			0.136159	0.797609	0	0.0662319	0	0	2	0.06	0.4	0.014	1.6	0.0025	0.321102	538.467	172.903	861.548	2.5	0.1	3.12	0.013	2.5	0	0.421019	47676.1
701.63	2.8	-15.468	61.9091	0.6383			66.5089	0.1294	14.9898	0.1124	0	0.183	0.2722	0.1747	3.1946	0.7475	5.3479	2.4756	5.8641	3.3984	19.3041		2.1768			0.136595	0.77591	0	0.0874944	0	0	2	0.06	0.4	0.014	1.6	0.0025	0.32097	542.568	174.148	868.108	2.5	0.1	3.12	0.013	2.5	0	0.420217	48000.4
699.63	2.8	-15.519	61.2508	0.631512			66.3641	0.1283	15.0719	0.11	0	0.178	0.2748	0.1682	3.2266	0.7114	5.4061	2.5022	5.8584	3.4241	18.8776		2.6921			0.136998	0.755291	0	0.107711	0	0	2	0.06	0.4	0.014	1.6	0.0025	0.320821	546.558	175.348	874.493	2.5	0.1	3.12	0.013	2.5	0	0.419424	48316.5
697.63	2.8	-15.57	60.6221	0.62503			66.2212	0.1273	15.1529	0.1077	0	0.1731	0.2773	0.1619	3.2576	0.677	5.463	2.5281	5.8529	3.449	18.4691		3.1873			0.137381	0.735662	0	0.126957	0	0	2	0.06	0.4	0.014	1.6	0.0025	0.320679	550.438	176.514	880.701	2.5	0.1	3.12	0.013	2.5	0	0.418669	48624
695.63	2.8	-15.622	59.8044	0.6166			66.081	0.126	15.1733	0.1055	0	0.1681	0.2807	0.1552	3.3014	0.6463	5.5374	2.5627	5.8624	3.4772	18.0164		3.7765			0.137601	0.712953	0	0.149445	0	0	2	0.06	0.4	0.014	1.6	0.0025	0.320072	555.703	177.865	889.125	2.5	0.1	3.12	0.013	2.5	0	0.417242	49043.2
693.63	2.8	-15.673	58.8067	0.606314			65.9426	0.1245	15.1322	0.1033	0	0.163	0.2851	0.1481	3.3585	0.6192	5.63	2.6062	5.8874	3.5084	17.5266		4.4533			0.137647	0.687633	0	0.174719	0	0	2	0.06	0.4	0.014	1.6	0.0025	0.318999	562.397	179.404	899.836	2.5	0.1	3.12	0.013	2.5	0	0.415153	49578.2
691.63	2.8	-15.725	57.8551	0.596502			65.8047	0.1229	15.0916	0.1012	0	0.158	0.2893	0.1414	3.4147	0.5931	5.7213	2.649	5.9126	3.5384	17.0644		5.0996			0.137668	0.663922	0	0.198409	0	0	2	0.06	0.4	0.014	1.6	0.0025	0.317949	568.989	180.91	910.382	2.5	0.1	3.12	0.013	2.5	0	0.413142	50105.5
689.63	2.8	-15.777	56.9462	0.587131			65.6673	0.1214	15.0515	0.0992	0	0.1531	0.2935	0.135	3.4701	0.5681	5.8113	2.6913	5.9381	3.5673	16.6275		5.7177			0.137667	0.641679	0	0.220654	0	0	2	0.06	0.4	0.014	1.6	0.0025	0.316924	575.482	182.384	920.771	2.5	0.1	3.12	0.013	2.5	0	0.411204	50625.5
687.63	2.8	-15.829	56.0767	0.578166			65.5302	0.1199	15.0118	0.0972	0	0.1485	0.2977	0.1289	3.5247	0.5441	5.9002	2.733	5.9639	3.5952	16.2143		6.3098			0.137645	0.620779	0	0.241576	0	0	2	0.06	0.4	0.014	1.6	0.0025	0.315919	581.882	183.828	931.011	2.5	0.1	3.12	0.013	2.5	0	0.409332	51138.7
685.63	2.8	-15.882	55.2439	0.56958			65.3935	0.1183	14.9725	0.0952	0	0.1439	0.3017	0.1232	3.5786	0.521	5.9879	2.7742	5.99	3.6222	15.8229		6.8775			0.137608	0.601115	0	0.261277	0	0	2	0.06	0.4	0.014	1.6	0.0025	0.314941	588.192	185.246	941.108	2.5	0.1	3.12	0.013	2.5	0	0.407528	51645
683.63	2.8	-15.934	54.4453	0.561346			65.257	0.1167	14.9337	0.0933	0	0.1395	0.3057	0.1177	3.6317	0.4989	6.0745	2.8149	6.0163	3.6484	15.4518		7.4227			0.137557	0.582583	0	0.27986	0	0	2	0.06	0.4	0.014	1.6	0.0025	0.313986	594.417	186.639	951.068	2.5	0.1	3.12	0.013	2.5	0	0.405788	52144.9
681.63	2.8	-15.987	53.6784	0.553439			65.1209	0.1152	14.8954	0.0914	0	0.1352	0.3096	0.1124	3.6841	0.4777	6.16	2.8552	6.0429	3.674	15.0996		7.9468			0.137498	0.565096	0	0.297406	0	0	2	0.06	0.4	0.014	1.6	0.0025	0.313065	600.557	188.014	960.892	2.5	0.1	3.12	0.013	2.5	0	0.404121	52638.2
679.63	2.8	-16.04	52.9411	0.545837			64.9849	0.1136	14.8575	0.0896	0	0.1311	0.3135	0.1074	3.7358	0.4574	6.2445	2.8949	6.0698	3.6991	14.765		8.4513			0.137434	0.548571	0	0.313995	0	0	2	0.06	0.4	0.014	1.6	0.0025	0.312179	606.616	189.373	970.585	2.5	0.1	3.12	0.013	2.5	0	0.402525	53125.1
677.63	2.8	-16.093	52.1334	0.53751			64.8382	0.1122	14.8245	0.0876	0	0.1269	0.3178	0.1024	3.7916	0.4373	6.3359	2.9398	6.0857	3.7248	14.5431		8.9714			0.136744	0.533901	0	0.329355	0	0	2	0.06	0.4	0.014	1.6	0.0025	0.310132	613.844	190.373	982.15	2.5	0.1	3.12	0.013	2.5	0	0.399531	53715.1
675.63	2.8	-16.147	43.9101	0.452726	0.5268	83.3526	64.1853	0.1097	14.6438	0.0868	0	0.1229	0.3732	0.1001	4.1988	0.417	6.3566	3.2818	6.1238	3.7675	14.4982	4.006	11.8416		0.216	0.109746	0.422327	0.116693	0.344941	0	0.006292	2	0.06	0.4	0.014	1.6	0.0025	0.296354	698.603	207.034	1117.76	2.5	0.1	3.12	0.013	2.5	0	0.685165	47485.1
673.63	2.8	-16.201	22.387	0.230817	1.8484	12.1116	63.4853	0.1037	14.4325	0.0881	0	0.123	0.6935	0.1011	4.5107	0.4055	6.2598	3.5369	6.2601	3.8457	13.4246	14.9516	18.8356		1.7477	0.0728281	0.254229	0.283146	0.3567	0	0.0330971	2	0.06	0.4	0.014	1.6	0.0025	0.279245	1150.77	321.347	1841.23	2.5	0.1	3.12	0.013	2.5	0	1.09555	32163.5
671.63	2.8	-16.255	14.3327	0.147774	2.331	6.14873	62.6619	0.0983	14.1873	0.0896	0	0.123	1.0332	0.1024	4.892	0.3932	6.1523	3.8499	6.417	3.8787	12.9111	18.9785	21.4979		2.3139	0.0651006	0.216702	0.318538	0.360823	0	0.0388368	2	0.06	0.4	0.014	1.6	0.0025	0.275767	1597.59	440.562	2556.14	2.5	0.1	3.12	0.013	2.5	0	1.18295	26078.3
669.63	2.8	-16.309	10.1197	0.104337	2.5744	3.93091	61.6439	0.093	13.8885	0.0914	0	0.1229	1.4022	0.1044	5.3842	0.3798	6.028	4.2557	6.6059	3.8989	12.567	21.0359	22.9243		2.5997	0.061862	0.199395	0.333766	0.363729	0	0.0412482	2	0.06	0.4	0.014	1.6	0.0025	0.27439	2062.01	565.794	3299.22	2.5	0.1	3.12	0.013	2.5	0	1.22067	22469.7
667.63	2.8	-16.363	7.48044	0.0771254	2.7196	2.75057	60.2486	0.0875	13.4863	0.0937	0	0.1228	1.8252	0.1077	6.0939	0.3641	5.8714	4.8437	6.8552	3.9138	12.3061	22.2906	23.8457		2.7609	0.060104	0.188984	0.342316	0.366197	0	0.042399	2	0.06	0.4	0.014	1.6	0.0025	0.273706	2572.06	703.989	4115.3	2.5	0.1	3.12	0.013	2.5	0	1.24194	19905.2
665.63	2.8	-16.418	5.32339	0.0548856	2.8354	1.87747	57.1717	0.0792	12.6068	0.0989	0	0.1222	2.4793	0.1172	7.8033	0.3381	5.5584	6.2715	7.3533	3.9257	12.2098	23.2708	24.6149	0.0733	2.8281	0.0586603	0.182447	0.347727	0.367811	0.0010953	0.0422593	2	0.06	0.4	0.014	1.6	0.0025	0.274366	3286.64	901.741	5258.62	2.5	0.1	3.12	0.013	2.5	0	1.25732	17532.1
663.63	2.8	-16.473	0.819603	0.00845033	3.3015	0.248252	5.8818	0.0202	0.2628	0.0426	0	0.0155	11.1361	0.2171	41.7366	0	0.1814	35.1345	5.3715	3.9076	13.3111	25.9849	25.757		2.9364	0.05435	0.185141	0.361418	0.358249	0	0.0408418	2	0.06	0.4	0.014	1.6	0.0025	0.269493	13076.5	3524.04	20922.4	2.5	0.1	3.12	0.013	2.5	0	1.28667	9416.62
661.63	2.8	-16.528	0.819603	0.00845033	3.3015	0.248252	5.8818	0.0202	0.2628	0.0427	0	0.0154	11.1361	0.2171	41.7366	0	0.1814	35.1345	5.3715	3.9076	13.3111	25.9849	25.757		2.9364	0.05435	0.185141	0.361418	0.358249	0	0.0408418	2	0.06	0.4	0.014	1.6	0.0025	0.269493	13076.5	3524.04	20922.4	2.5	0.1	3.12	0.013	2.5	0	1.28667	9416.62
659.63	2.8	-16.583	0.819603	0.00845033	3.3015	0.248252	5.8818	0.0202	0.2628	0.0427	0	0.0153	11.1361	0.2171	41.7366	0	0.1814	35.1345	5.3715	3.9076	13.3111	25.9849	25.757		2.9364	0.05435	0.185141	0.361418	0.358249	0	0.0408418	2	0.06	0.4	0.014	1.6	0.0025	0.269493	13076.5	3524.04	20922.4	2.5	0.1	3.12	0.013	2.5	0	1.28667	9416.62
657.63	2.8	-16.639	0.819603	0.00845033	3.3015	0.248252	5.8818	0.0202	0.2628	0.0428	0	0.0152	11.1361	0.2171	41.7366	0	0.1814	35.1345	5.3715	3.9076	13.3111	25.9849	25.757		2.9364	0.05435	0.185141	0.361418	0.358249	0	0.0408418	2	0.06	0.4	0.014	1.6	0.0025	0.269493	13076.5	3524.04	20922.4	2.5	0.1	3.12	0.013	2.5	0	1.28667	9416.62
655.63	2.8	-16.695	0.819603	0.00845033	3.3015	0.248252	5.8818	0.0202	0.2628	0.0429	0	0.0152	11.1361	0.2171	41.7366	0	0.1814	35.1345	5.3715	3.9076	13.3111	25.9849	25.757		2.9364	0.05435	0.185141	0.361418	0.358249	0	0.0408418	2	0.06	0.4	0.014	1.6	0.0025	0.269493	13076.5	3524.04	20922.4	2.5	0.1	3.12	0.013	2.5	0	1.28667	9416.62
653.63	2.8	-16.751	0.819603	0.00845033	3.3015	0.248252	5.8818	0.0202	0.2628	0.043	0	0.0151	11.1361	0.2171	41.7366	0	0.1814	35.1345	5.3715	3.9076	13.3111	25.9849	25.757		2.9364	0.05435	0.185141	0.361418	0.358249	0	0.0408418	2	0.06	0.4	0.014	1.6	0.0025	0.269493	13076.5	3524.04	20922.4	2.5	0.1	3.12	0.013	2.5	0	1.28667	9416.62
651.63	2.8	-16.807	0.819603	0.00845033	3.3015	0.248252	5.8818	0.0202	0.2628	0.0431	0	0.015	11.1361	0.2171	41.7366	0	0.1814	35.1345	5.3715	3.9076	13.3111	25.9849	25.757		2.9364	0.05435	0.185141	0.361418	0.358249	0	0.0408418	2	0.06	0.4	0.014	1.6	0.0025	0.269493	13076.5	3524.04	20922.4	2.5	0.1	3.12	0.013	2.5	0	1.28667	9416.62
649.63	2.8	-16.864	0.819603	0.00845033	3.3015	0.248252	5.8818	0.0202	0.2628	0.0432	0	0.0149	11.1361	0.2171	41.7366	0	0.1814	35.1345	5.3715	3.9076	13.3111	25.9849	25.757		2.9364	0.05435	0.185141	0.361418	0.358249	0	0.0408418	2	0.06	0.4	0.014	1.6	0.0025	0.269493	13076.5	3524.04	20922.4	2.5	0.1	3.12	0.013	2.5	0	1.28667	9416.62
647.63	2.8	-16.92	0.817612	0.0084298	3.3015	0.247649	5.7859	0.0202	0.17	0.0434	0	0.0149	11.1632	0.2176	41.8382	0	0.1531	35.22	5.3735	3.9076	13.3111	25.9849	25.757	0.002	2.9364	0.0543485	0.185136	0.361408	0.358239	2.78168e-05	0.0408406	2	0.06	0.4	0.014	1.6	0.0025	0.26953	13097.5	3530.17	20955.9	2.5	0.1	3.12	0.013	2.5	0	1.28671	9408.54
645.63	2.8	-16.977	0.817612	0.0084298	3.3015	0.247649	5.7859	0.0202	0.17	0.0435	0	0.0148	11.1632	0.2176	41.8382	0	0.1531	35.22	5.3735	3.9076	13.3111	25.9849	25.757	0.002	2.9364	0.0543485	0.185136	0.361408	0.358239	2.78168e-05	0.0408406	2	0.06	0.4	0.014	1.6	0.0025	0.26953	13097.5	3530.17	20955.9	2.5	0.1	3.12	0.013	2.5	0	1.28671	9408.54
643.63	2.8	-17.035	0.817612	0.0084298	3.3015	0.247649	5.7859	0.0202	0.17	0.0436	0	0.0147	11.1632	0.2176	41.8382	0	0.1531	35.22	5.3735	3.9076	13.3111	25.9849	25.757	0.002	2.9364	0.0543485	0.185136	0.361408	0.358239	2.78168e-05	0.0408406	2	0.06	0.4	0.014	1.6	0.0025	0.26953	13097.5	3530.17	20955.9	2.5	0.1	3.12	0.013	2.5	0	1.28671	9408.54
641.63	2.8	-17.092	0.817612	0.0084298	3.3015	0.247649	5.7859	0.0202	0.17	0.0436	0	0.0146	11.1632	0.2176	41.8382	0	0.1531	35.22	5.3735	3.9076	13.3111	25.9849	25.757	0.002	2.9364	0.0543485	0.185136	0.361408	0.358239	2.78168e-05	0.0408406	2	0.06	0.4	0.014	1.6	0.0025	0.26953	13097.5	3530.17	20955.9	2.5	0.1	3.12	0.013	2.5	0	1.28671	9408.54
639.63	2.8	-17.15	0.817612	0.00842981	3.3015	0.247649	5.7859	0.0202	0.17	0.0437	0	0.0146	11.1632	0.2176	41.8382	0	0.1531	35.22	5.3735	3.9076	13.3111	25.9849	25.757	0.002	2.9364	0.0543485	0.185136	0.361408	0.358239	2.78168e-05	0.0408406	2	0.06	0.4	0.014	1.6	0.0025	0.26953	13097.5	3530.16	20955.9	2.5	0.1	3.12	0.013	2.5	0	1.28671	9408.54
637.63	2.8	-17.208	0.817612	0.00842981	3.3015	0.247649	5.7859	0.0202	0.17	0.0438	0	0.0145	11.1632	0.2176	41.8382	0	0.1531	35.22	5.3735	3.9076	13.3111	25.9849	25.757	0.002	2.9364	0.0543485	0.185136	0.361408	0.358239	2.78168e-05	0.0408406	2	0.06	0.4	0.014	1.6	0.0025	0.26953	13097.5	3530.16	20955.9	2.5	0.1	3.12	0.013	2.5	0	1.28671	9408.54
635.63	2.8	-17.266	0.817612	0.00842981	3.3015	0.247649	5.7859	0.0202	0.17	0.0439	0	0.0144	11.1632	0.2176	41.8382	0	0.1531	35.22	5.3735	3.9076	13.3111	25.9849	25.757	0.002	2.9364	0.0543485	0.185136	0.361408	0.358239	2.78168e-05	0.0408406	2	0.06	0.4	0.014	1.6	0.0025	0.26953	13097.5	3530.16	20955.9	2.5	0.1	3.12	0.013	2.5	0	1.28671	9408.54
633.63	2.8	-17.325	0.817612	0.00842981	3.3015	0.247649	5.7859	0.0202	0.17	0.044	0	0.0143	11.1632	0.2176	41.8382	0	0.1531	35.22	5.3735	3.9076	13.3111	25.9849	25.757	0.002	2.9364	0.0543485	0.185136	0.361408	0.358239	2.78168e-05	0.0408406	2	0.06	0.4	0.014	1.6	0.0025	0.26953	13097.5	3530.16	20955.9	2.5	0.1	3.12	0.013	2.5	0	1.28671	9408.54
631.63	2.8	-17.384	0.817612	0.00842981	3.3015	0.247649	5.7859	0.0202	0.17	0.0441	0	0.0142	11.1632	0.2176	41.8382	0	0.1531	35.22	5.3735	3.9076	13.3111	25.9849	25.757	0.002	2.9364	0.0543485	0.185136	0.361408	0.358239	2.78168e-05	0.0408406	2	0.06	0.4	0.014	1.6	0.0025	0.26953	13097.5	3530.16	20955.9	2.5	0.1	3.12	0.013	2.5	0	1.28671	9408.54
629.63	2.8	-17.443	0.817612	0.00842981	3.3015	0.247649	5.7859	0.0202	0.17	0.0442	0	0.0142	11.1632	0.2176	41.8382	0	0.1531	35.22	5.3735	3.9076	13.3111	25.9849	25.757	0.002	2.9364	0.0543485	0.185136	0.361408	0.358239	2.78168e-05	0.0408406	2	0.06	0.4	0.014	1.6	0.0025	0.26953	13097.5	3530.16	20955.9	2.5	0.1	3.12	0.013	2.5	0	1.28671	9408.54
627.63	2.8	-17.502	0.817612	0.00842981	3.3015	0.247649	5.7859	0.0202	0.17	0.0443	0	0.0141	11.1632	0.2176	41.8382	0	0.1531	35.22	5.3735	3.9076	13.3111	25.9849	25.757	0.002	2.9364	0.0543485	0.185136	0.361408	0.358239	2.78168e-05	0.0408406	2	0.06	0.4	0.014	1.6	0.0025	0.26953	13097.5	3530.16	20955.9	2.5	0.1	3.12	0.013	2.5	0	1.28671	9408.54
625.63	2.8	-17.562	0.817613	0.00842981	3.3015	0.247649	5.7859	0.0202	0.17	0.0443	0	0.014	11.1632	0.2176	41.8382	0	0.1531	35.22	5.3735	3.9076	13.3111	25.9849	25.757	0.002	2.9364	0.0543485	0.185136	0.361408	0.358239	2.78168e-05	0.0408406	2	0.06	0.4	0.014	1.6	0.0025	0.26953	13097.5	3530.16	20955.9	2.5	0.1	3.12	0.013	2.5	0	1.28671	9408.54
623.63	2.8	-17.622	0.817613	0.00842981	3.3015	0.247649	5.7859	0.0202	0.17	0.0444	0	0.0139	11.1632	0.2176	41.8382	0	0.1531	35.22	5.3735	3.9076	13.3111	25.9849	25.757	0.002	2.9364	0.0543485	0.185136	0.361408	0.358239	2.78168e-05	0.0408406	2	0.06	0.4	0.014	1.6	0.0025	0.26953	13097.5	3530.16	20955.9	2.5	0.1	3.12	0.013	2.5	0	1.28671	9408.54
621.63	2.8	-17.682	0.817613	0.00842981	3.3015	0.247649	5.7859	0.0202	0.17	0.0445	0	0.0138	11.1632	0.2176	41.8382	0	0.1531	35.22	5.3735	3.9076	13.3111	25.9849	25.757	0.002	2.9364	0.0543485	0.185136	0.361408	0.358239	2.78168e-05	0.0408406	2	0.06	0.4	0.014	1.6	0.0025	0.26953	13097.5	3530.16	20955.9	2.5	0.1	3.12	0.013	2.5	0	1.28671	9408.54
619.63	2.8	-17.742	0.817613	0.00842981	3.3015	0.247649	5.7859	0.0202	0.17	0.0446	0	0.0138	11.1632	0.2176	41.8382	0	0.1531	35.22	5.3735	3.9076	13.3111	25.9849	25.757	0.002	2.9364	0.0543485	0.185136	0.361408	0.358239	2.78168e-05	0.0408406	2	0.06	0.4	0.014	1.6	0.0025	0.26953	13097.5	3530.16	20955.9	2.5	0.1	3.12	0.013	2.5	0	1.28671	9408.54
617.63	2.8	-17.803	0.817613	0.00842981	3.3015	0.247649	5.7859	0.0202	0.17	0.0447	0	0.0137	11.1632	0.2176	41.8382	0	0.1531	35.22	5.3735	3.9076	13.3111	25.9849	25.757	0.002	2.9364	0.0543485	0.185136	0.361408	0.358239	2.78168e-05	0.0408406	2	0.06	0.4	0.014	1.6	0.0025	0.26953	13097.5	3530.16	20955.9	2.5	0.1	3.12	0.013	2.5	0	1.28671	9408.54
615.63	2.8	-17.864	0.817613	0.00842981	3.3015	0.247649	5.7859	0.0202	0.17	0.0448	0	0.0136	11.1632	0.2176	41.8382	0	0.1531	35.22	5.3735	3.9076	13.3111	25.9849	25.757	0.002	2.9364	0.0543485	0.185136	0.361408	0.358239	2.78168e-05	0.0408406	2	0.06	0.4	0.014	1.6	0.0025	0.26953	13097.5	3530.16	20955.9	2.5	0.1	3.12	0.013	2.5	0	1.28671	9408.54
613.63	2.8	-17.925	0.817613	0.00842981	3.3015	0.247649	5.7859	0.0202	0.17	0.0449	0	0.0135	11.1632	0.2176	41.8382	0	0.1531	35.22	5.3735	3.9076	13.3111	25.9849	25.757	0.002	2.9364	0.0543485	0.185136	0.361408	0.358239	2.78168e-05	0.0408406	2	0.06	0.4	0.014	1.6	0.0025	0.26953	13097.5	3530.16	20955.9	2.5	0.1	3.12	0.013	2.5	0	1.28671	9408.54
611.63	2.8	-17.987	0.817613	0.00842982	3.3015	0.247649	5.7859	0.0202	0.17	0.045	0	0.0134	11.1632	0.2176	41.8382	0	0.1531	35.22	5.3735	3.9076	13.3111	25.9849	25.757	0.002	2.9364	0.0543485	0.185136	0.361408	0.358239	2.78168e-05	0.0408406	2	0.06	0.4	0.014	1.6	0.0025	0.26953	13097.5	3530.16	20955.9	2.5	0.1	3.12	0.013	2.5	0	1.28671	9408.54
[truncated: 3 more columns]

## Sheet: Ke'eryin
Table S2-2. Modeling results for the Ke'eryin pegmatites
T (℃)	P (kbars)	log(10) fO2	liq mass (gm)	F	Fluid (gm)	Melt/fluid	Liquid composition (wt.%)													Solid mass (g)						Mass (%)						Parition coefficient (DRb)						Bulk DRb	Liquid Rb (ppm)	Solid Rb (ppm)	Ms Rb (ppm)	Parition coefficient (DK)						Dbulk K	Liquid K
							SiO2	TiO2	Al2O3	Fe2O3	Cr2O3	FeO	MnO	MgO	CaO	Na2O	K2O	P2O5	H2O	biotite	plagioclase	k-feldspar	quartz	muscovite	apatite	biotite	plagioclase	k-feldspar	quartz	muscovite	apatite	biotite	plagioclase	k-feldspar	quartz	muscovite	apatite					biotite	plagioclase	k-feldspar	quartz	muscovite	apatite
883.33	2.5	-11.607	98.2813	1			66.3879	0.3098	15.3181	0.418	0	0.9846	0.0485	0.8045	2.8506	2.6786	4.4488	0.1166	5.634		0.0455					0	1	0	0	0	0	2	0.06	0.4	0.014	1.6	0.0025	0.06	224.6	13.476	359.36	2.5	0.1	3.12	0.013	2.5	0	0.1	36000
881.33	2.5	-11.643	97.8904	0.996023			66.4537	0.308	15.2721	0.4122	0	0.9677	0.0487	0.8066	2.8209	2.6708	4.4657	0.1171	5.6565		0.4037					0	1	0	0	0	0	2	0.06	0.4	0.014	1.6	0.0025	0.06	225.443	13.5266	360.708	2.5	0.1	3.12	0.013	2.5	0	0.1	36129.3
879.33	2.5	-11.68	97.5012	0.992063			66.5188	0.3063	15.2263	0.4065	0	0.9511	0.0489	0.8087	2.7916	2.6625	4.4827	0.1175	5.6791		0.7609					0	1	0	0	0	0	2	0.06	0.4	0.014	1.6	0.0025	0.06	226.289	13.5773	362.062	2.5	0.1	3.12	0.013	2.5	0	0.1	36259.1
877.33	2.5	-11.716	97.1136	0.988119			66.5832	0.3046	15.1807	0.4008	0	0.9348	0.0491	0.8108	2.7627	2.6539	4.4997	0.118	5.7018		1.1171					0	1	0	0	0	0	2	0.06	0.4	0.014	1.6	0.0025	0.06	227.138	13.6283	363.42	2.5	0.1	3.12	0.013	2.5	0	0.1	36389.3
875.33	2.5	-11.753	96.7276	0.984192			66.6469	0.3028	15.1353	0.3953	0	0.9187	0.0493	0.8129	2.7341	2.6449	4.5167	0.1185	5.7245		1.4722					0	1	0	0	0	0	2	0.06	0.4	0.014	1.6	0.0025	0.06	227.99	13.6794	364.783	2.5	0.1	3.12	0.013	2.5	0	0.1	36520
873.33	2.5	-11.789	96.3432	0.98028			66.7099	0.3011	15.0901	0.3898	0	0.9028	0.0495	0.8151	2.7059	2.6356	4.5338	0.1189	5.7474		1.8263					0	1	0	0	0	0	2	0.06	0.4	0.014	1.6	0.0025	0.06	228.844	13.7307	366.151	2.5	0.1	3.12	0.013	2.5	0	0.1	36651.1
871.33	2.5	-11.826	95.9604	0.976386			66.7722	0.2994	15.0451	0.3843	0	0.8872	0.0497	0.8173	2.6781	2.626	4.551	0.1194	5.7703		2.1793					0	1	0	0	0	0	2	0.06	0.4	0.014	1.6	0.0025	0.06	229.702	13.7821	367.524	2.5	0.1	3.12	0.013	2.5	0	0.1	36782.7
869.33	2.5	-11.863	95.5793	0.972508			66.8339	0.2977	15.0003	0.3789	0	0.8718	0.0499	0.8195	2.6507	2.6159	4.5682	0.1199	5.7933		2.5313					0	1	0	0	0	0	2	0.06	0.4	0.014	1.6	0.0025	0.06	230.563	13.8338	368.901	2.5	0.1	3.12	0.013	2.5	0	0.1	36914.6
867.33	2.5	-11.9	95.1999	0.968647			66.8949	0.296	14.9557	0.3736	0	0.8567	0.0501	0.8217	2.6236	2.6056	4.5854	0.1204	5.8164		2.8821					0	1	0	0	0	0	2	0.06	0.4	0.014	1.6	0.0025	0.06	231.427	13.8856	370.283	2.5	0.1	3.12	0.013	2.5	0	0.1	37047
865.33	2.5	-11.937	94.8221	0.964803			66.9553	0.2943	14.9112	0.3684	0	0.8418	0.0503	0.8239	2.5969	2.5949	4.6026	0.1209	5.8396		3.2318					0	1	0	0	0	0	2	0.06	0.4	0.014	1.6	0.0025	0.06	232.294	13.9376	371.67	2.5	0.1	3.12	0.013	2.5	0	0.1	37179.8
863.33	2.5	-11.975	94.446	0.960977			67.0149	0.2926	14.867	0.3632	0	0.8272	0.0505	0.8261	2.5706	2.5838	4.6199	0.1213	5.8628		3.5803					0	1	0	0	0	0	2	0.06	0.4	0.014	1.6	0.0025	0.06	233.163	13.9898	373.061	2.5	0.1	3.12	0.013	2.5	0	0.1	37313.1
861.33	2.5	-12.012	94.0716	0.957168			67.074	0.2909	14.823	0.3581	0	0.8127	0.0507	0.8284	2.5446	2.5724	4.6373	0.1218	5.8862		3.9277					0	1	0	0	0	0	2	0.06	0.4	0.014	1.6	0.0025	0.06	234.035	14.0421	374.456	2.5	0.1	3.12	0.013	2.5	0	0.1	37446.7
859.33	2.5	-12.05	93.699	0.953376			67.1324	0.2892	14.7791	0.3531	0	0.7985	0.0509	0.8307	2.5189	2.5607	4.6546	0.1223	5.9096		4.2738					0	1	0	0	0	0	2	0.06	0.4	0.014	1.6	0.0025	0.06	234.91	14.0946	375.856	2.5	0.1	3.12	0.013	2.5	0	0.1	37580.7
857.33	2.5	-12.088	93.3281	0.949602			67.1901	0.2875	14.7355	0.3481	0	0.7845	0.0511	0.833	2.4937	2.5487	4.672	0.1228	5.933		4.6187					0	1	0	0	0	0	2	0.06	0.4	0.014	1.6	0.0025	0.06	235.787	14.1472	377.26	2.5	0.1	3.12	0.013	2.5	0	0.1	37715.1
855.33	2.5	-12.126	92.959	0.945846			67.2473	0.2858	14.692	0.3432	0	0.7708	0.0513	0.8353	2.4687	2.5363	4.6895	0.1233	5.9566		4.9623					0	1	0	0	0	0	2	0.06	0.4	0.014	1.6	0.0025	0.06	236.667	14.2	378.668	2.5	0.1	3.12	0.013	2.5	0	0.1	37849.8
853.33	2.5	-12.164	92.5916	0.942108			67.3038	0.2841	14.6487	0.3383	0	0.7572	0.0515	0.8376	2.4442	2.5236	4.7069	0.1238	5.9802		5.3046					0	1	0	0	0	0	2	0.06	0.4	0.014	1.6	0.0025	0.06	237.55	14.253	380.08	2.5	0.1	3.12	0.013	2.5	0	0.1	37985
851.33	2.5	-12.202	92.2261	0.938389			67.3597	0.2824	14.6057	0.3335	0	0.7439	0.0517	0.8399	2.4199	2.5107	4.7244	0.1243	6.0039		5.6455					0	1	0	0	0	0	2	0.06	0.4	0.014	1.6	0.0025	0.06	238.435	14.3061	381.496	2.5	0.1	3.12	0.013	2.5	0	0.1	38120.4
849.33	2.5	-12.24	91.8623	0.934688			67.4149	0.2807	14.5628	0.3288	0	0.7308	0.0519	0.8423	2.396	2.4974	4.7419	0.1248	6.0277		5.9852					0	1	0	0	0	0	2	0.06	0.4	0.014	1.6	0.0025	0.06	239.322	14.3593	382.916	2.5	0.1	3.12	0.013	2.5	0	0.1	38256.3
847.33	2.5	-12.278	91.5004	0.931006			67.4696	0.2791	14.52	0.3241	0	0.7179	0.0521	0.8446	2.3725	2.4838	4.7595	0.1252	6.0516		6.3234					0	1	0	0	0	0	2	0.06	0.4	0.014	1.6	0.0025	0.06	240.212	14.4127	384.339	2.5	0.1	3.12	0.013	2.5	0	0.1	38392.4
845.33	2.5	-12.317	91.1404	0.927343			67.5237	0.2774	14.4775	0.3195	0	0.7052	0.0523	0.847	2.3493	2.4699	4.777	0.1257	6.0755		6.6602					0	1	0	0	0	0	2	0.06	0.4	0.014	1.6	0.0025	0.06	241.104	14.4662	385.766	2.5	0.1	3.12	0.013	2.5	0	0.1	38528.9
843.33	2.5	-12.356	90.7823	0.923699			67.5771	0.2757	14.4352	0.315	0	0.6926	0.0525	0.8494	2.3264	2.4557	4.7946	0.1262	6.0994		6.9956					0	1	0	0	0	0	2	0.06	0.4	0.014	1.6	0.0025	0.06	241.998	14.5199	387.196	2.5	0.1	3.12	0.013	2.5	0	0.1	38665.6
841.33	2.5	-12.395	90.4261	0.920074			67.63	0.2741	14.3931	0.3105	0	0.6803	0.0528	0.8518	2.3038	2.4412	4.8122	0.1267	6.1235		7.3295					0	1	0	0	0	0	2	0.06	0.4	0.014	1.6	0.0025	0.06	242.894	14.5736	388.63	2.5	0.1	3.12	0.013	2.5	0	0.1	38802.7
839.33	2.5	-12.434	89.8907	0.914627			67.6877	0.2751	14.3654	0.3059	0	0.6677	0.0531	0.8094	2.28	2.429	4.8395	0.1275	6.1599		7.7012					0	1	0	0	0	0	2	0.06	0.4	0.014	1.6	0.0025	0.06	244.253	14.6552	390.805	2.5	0.1	3.12	0.013	2.5	0	0.1	39010.6
837.33	2.5	-12.473	89.4902	0.910552			67.7408	0.2742	14.3275	0.3015	0	0.6556	0.0533	0.7996	2.2576	2.4146	4.8598	0.1281	6.1875		8.0421					0	1	0	0	0	0	2	0.06	0.4	0.014	1.6	0.0025	0.06	245.281	14.7168	392.449	2.5	0.1	3.12	0.013	2.5	0	0.1	39167.7
835.33	2.5	-12.512	89.0927	0.906507			67.7933	0.2733	14.2898	0.2971	0	0.6437	0.0535	0.79	2.2356	2.3999	4.8801	0.1286	6.2151		8.3812					0	1	0	0	0	0	2	0.06	0.4	0.014	1.6	0.0025	0.06	246.309	14.7786	394.095	2.5	0.1	3.12	0.013	2.5	0	0.1	39325
833.33	2.5	-12.551	88.6981	0.902493			67.8452	0.2724	14.2522	0.2928	0	0.632	0.0538	0.7804	2.2139	2.385	4.9004	0.1292	6.2427		8.7183					0	1	0	0	0	0	2	0.06	0.4	0.014	1.6	0.0025	0.06	247.339	14.8403	395.742	2.5	0.1	3.12	0.013	2.5	0	0.1	39482.4
831.33	2.5	-12.591	88.3066	0.898509			67.8965	0.2715	14.2148	0.2885	0	0.6205	0.054	0.771	2.1925	2.3698	4.9207	0.1298	6.2704		9.0534					0	1	0	0	0	0	2	0.06	0.4	0.014	1.6	0.0025	0.06	248.37	14.9022	397.392	2.5	0.1	3.12	0.013	2.5	0	0.1	39639.9
829.33	2.5	-12.631	87.918	0.894555			67.9473	0.2706	14.1775	0.2843	0	0.6092	0.0543	0.7617	2.1714	2.3543	4.941	0.1303	6.2981		9.3866					0	1	0	0	0	0	2	0.06	0.4	0.014	1.6	0.0025	0.06	249.401	14.9641	399.042	2.5	0.1	3.12	0.013	2.5	0	0.1	39797.5
827.33	2.5	-12.67	87.4851	0.89015			68.0737	0.2665	14.1077	0.2817	0	0.6018	0.0545	0.7502	2.1528	2.3376	4.9274	0.131	6.3153	0.2846	9.7419					0.0283848	0.971615	0	0	0	0	2	0.06	0.4	0.014	1.6	0.0025	0.115066	248.961	28.6471	398.338	2.5	0.1	3.12	0.013	2.5	0	0.168123	39659.1
825.33	2.5	-12.71	87.0592	0.885817			68.1712	0.2638	14.0517	0.2785	0	0.5931	0.0548	0.7356	2.1337	2.3211	4.9275	0.1316	6.3375	0.4591	10.0881					0.0435281	0.956472	0	0	0	0	2	0.06	0.4	0.014	1.6	0.0025	0.144445	249.15	35.9883	398.639	2.5	0.1	3.12	0.013	2.5	0	0.204468	39645.3
823.33	2.5	-12.751	86.6413	0.881565			68.239	0.2626	14.0097	0.2747	0	0.583	0.0551	0.7186	2.1138	2.305	4.9414	0.1323	6.3649	0.5232	10.4255					0.0477865	0.952214	0	0	0	0	2	0.06	0.4	0.014	1.6	0.0025	0.152706	249.917	38.1638	399.867	2.5	0.1	3.12	0.013	2.5	0	0.214688	39746.2
821.33	2.5	-12.791	86.2282	0.877362			68.3059	0.2614	13.9679	0.271	0	0.573	0.0553	0.7019	2.0943	2.2886	4.9554	0.1329	6.3923	0.5855	10.7601					0.0516059	0.948394	0	0	0	0	2	0.06	0.4	0.014	1.6	0.0025	0.160115	250.688	40.139	401.1	2.5	0.1	3.12	0.013	2.5	0	0.223854	39847.8
819.33	2.5	-12.831	85.8199	0.873207			68.372	0.2602	13.9263	0.2674	0	0.5632	0.0556	0.6857	2.075	2.272	4.9695	0.1335	6.4197	0.6462	11.0919					0.0550515	0.944949	0	0	0	0	2	0.06	0.4	0.014	1.6	0.0025	0.1668	251.461	41.9437	402.338	2.5	0.1	3.12	0.013	2.5	0	0.232124	39950
817.33	2.5	-12.872	85.4163	0.869101			68.4372	0.259	13.8849	0.2637	0	0.5535	0.0558	0.6698	2.0561	2.2552	4.9837	0.1342	6.447	0.7053	11.421					0.0581628	0.941837	0	0	0	0	2	0.06	0.4	0.014	1.6	0.0025	0.172836	252.237	43.5956	403.579	2.5	0.1	3.12	0.013	2.5	0	0.239591	40052.9
815.33	2.5	-12.913	85.0173	0.865041			68.5016	0.2578	13.8438	0.2601	0	0.5439	0.0561	0.6542	2.0374	2.2381	4.9979	0.1348	6.4743	0.7629	11.7473					0.0609822	0.939018	0	0	0	0	2	0.06	0.4	0.014	1.6	0.0025	0.178306	253.015	45.114	404.824	2.5	0.1	3.12	0.013	2.5	0	0.246357	40156.4
813.33	2.5	-12.953	84.6229	0.861028			68.5651	0.2566	13.8028	0.2566	0	0.5345	0.0564	0.639	2.0191	2.2207	5.0122	0.1354	6.5017	0.8189	12.0709					0.0635309	0.936469	0	0	0	0	2	0.06	0.4	0.014	1.6	0.0025	0.18325	253.796	46.508	406.073	2.5	0.1	3.12	0.013	2.5	0	0.252474	40260.5
811.33	2.5	-12.994	84.233	0.857061			68.6279	0.2553	13.7621	0.2531	0	0.5252	0.0566	0.6241	2.001	2.2032	5.0265	0.1361	6.529	0.8735	12.3917					0.065849	0.934151	0	0	0	0	2	0.06	0.4	0.014	1.6	0.0025	0.187747	254.578	47.7963	407.325	2.5	0.1	3.12	0.013	2.5	0	0.258038	40365
809.33	2.5	-13.036	83.8476	0.853139			68.6898	0.2541	13.7216	0.2496	0	0.5161	0.0569	0.6095	1.9832	2.1854	5.0408	0.1367	6.5563	0.9267	12.7098					0.0679573	0.932043	0	0	0	0	2	0.06	0.4	0.014	1.6	0.0025	0.191837	255.362	48.988	408.58	2.5	0.1	3.12	0.013	2.5	0	0.263098	40470.1
807.33	2.5	-13.077	83.4666	0.849263			68.7509	0.2529	13.6813	0.2462	0	0.5071	0.0571	0.5953	1.9657	2.1674	5.0553	0.1373	6.5835	0.9784	13.0252					0.0698677	0.930132	0	0	0	0	2	0.06	0.4	0.014	1.6	0.0025	0.195543	256.149	50.0882	409.838	2.5	0.1	3.12	0.013	2.5	0	0.267683	40575.7
805.33	2.5	-13.118	83.09	0.845431			68.8113	0.2517	13.6412	0.2428	0	0.4982	0.0574	0.5814	1.9484	2.1493	5.0697	0.1379	6.6107	1.0289	13.3379					0.0716165	0.928383	0	0	0	0	2	0.06	0.4	0.014	1.6	0.0025	0.198936	256.936	51.1138	411.098	2.5	0.1	3.12	0.013	2.5	0	0.27188	40681.7
803.33	2.5	-13.16	82.7176	0.841642			68.8709	0.2505	13.6013	0.2394	0	0.4894	0.0577	0.5678	1.9314	2.1309	5.0842	0.1385	6.6379	1.078	13.6479					0.0732044	0.926796	0	0	0	0	2	0.06	0.4	0.014	1.6	0.0025	0.202016	257.725	52.0647	412.36	2.5	0.1	3.12	0.013	2.5	0	0.27569	40788.1
801.33	2.5	-13.202	82.3496	0.837897			68.9297	0.2493	13.5616	0.2361	0	0.4808	0.0579	0.5545	1.9147	2.1124	5.0987	0.1392	6.6651	1.1258	13.9552					0.0746502	0.92535	0	0	0	0	2	0.06	0.4	0.014	1.6	0.0025	0.204821	258.516	52.9496	413.625	2.5	0.1	3.12	0.013	2.5	0	0.279161	40895
799.33	2.5	-13.244	81.9422	0.833752			69	0.2482	13.5197	0.2328	0	0.4721	0.0582	0.5413	1.8969	2.0917	5.1156	0.1399	6.6836	1.1739	14.2915					0.0759049	0.924095	0	0	0	0	2	0.06	0.4	0.014	1.6	0.0025	0.207256	259.422	53.7667	415.076	2.5	0.1	3.12	0.013	2.5	0	0.282172	41018.9
797.33	2.5	-13.286	81.4156	0.828394			69.1047	0.2476	13.4712	0.2292	0	0.463	0.0586	0.5278	1.876	2.0651	5.1389	0.1408	6.6771	1.2246	14.7148					0.0768285	0.923172	0	0	0	0	2	0.06	0.4	0.014	1.6	0.0025	0.209047	260.664	54.491	417.062	2.5	0.1	3.12	0.013	2.5	0	0.284388	41192
795.33	2.5	-13.328	80.8872	0.823018			69.2163	0.2288	13.4203	0.2286	0	0.46	0.0587	0.5142	1.8548	2.0387	5.1631	0.1417	6.6749	1.2721	15.1356					0.0775307	0.922469	0	0	0	0	2	0.06	0.4	0.014	1.6	0.0025	0.21041	261.94	55.1147	419.104	2.5	0.1	3.12	0.013	2.5	0	0.286074	41370.8
793.33	2.5	-13.371	80.3759	0.817815			69.3199	0.2262	13.3724	0.2254	0	0.4518	0.059	0.5013	1.8349	2.0117	5.1865	0.1426	6.6685	1.3196	15.5475					0.0782351	0.921765	0	0	0	0	2	0.06	0.4	0.014	1.6	0.0025	0.211776	263.182	55.7358	421.092	2.5	0.1	3.12	0.013	2.5	0	0.287764	41544.4
791.33	2.5	-13.413	79.8728	0.812696			69.4223	0.2236	13.3251	0.2222	0	0.4437	0.0593	0.4887	1.8154	1.9845	5.2098	0.1435	6.6619	1.3658	15.9534					0.0788605	0.92114	0	0	0	0	2	0.06	0.4	0.014	1.6	0.0025	0.212989	264.422	56.319	423.075	2.5	0.1	3.12	0.013	2.5	0	0.289265	41717.7
789.33	2.5	-13.456	79.3776	0.807658			69.5238	0.221	13.2782	0.2191	0	0.4357	0.0597	0.4765	1.7964	1.9571	5.233	0.1444	6.6552	1.4105	16.3535					0.0794022	0.920598	0	0	0	0	2	0.06	0.4	0.014	1.6	0.0025	0.21404	265.659	56.8618	425.055	2.5	0.1	3.12	0.013	2.5	0	0.290565	41890.8
787.33	2.5	-13.499	78.8906	0.802702			69.6242	0.2185	13.2318	0.216	0	0.4278	0.06	0.4645	1.7778	1.9296	5.2562	0.1453	6.6482	1.4539	16.7476					0.079878	0.920122	0	0	0	0	2	0.06	0.4	0.014	1.6	0.0025	0.214963	266.894	57.3723	427.03	2.5	0.1	3.12	0.013	2.5	0	0.291707	42063.5
785.33	2.5	-13.542	78.4115	0.797828			69.7237	0.2159	13.186	0.213	0	0.4201	0.0603	0.4528	1.7597	1.902	5.2793	0.1462	6.641	1.496	17.1358					0.0802928	0.919707	0	0	0	0	2	0.06	0.4	0.014	1.6	0.0025	0.215768	268.124	57.8526	428.999	2.5	0.1	3.12	0.013	2.5	0	0.292703	42235.9
783.33	2.5	-13.585	77.9403	0.793034			69.8221	0.2135	13.1406	0.21	0	0.4125	0.0607	0.4415	1.742	1.8742	5.3023	0.147	6.6337	1.5368	17.518					0.0806516	0.919348	0	0	0	0	2	0.06	0.4	0.014	1.6	0.0025	0.216464	269.351	58.3048	430.961	2.5	0.1	3.12	0.013	2.5	0	0.293564	42407.9
781.33	2.5	-13.628	77.4771	0.78832			69.9195	0.211	13.0957	0.207	0	0.4049	0.061	0.4304	1.7248	1.8464	5.3252	0.1479	6.6262	1.5764	17.8943					0.0809627	0.919037	0	0	0	0	2	0.06	0.4	0.014	1.6	0.0025	0.217068	270.573	58.7327	432.917	2.5	0.1	3.12	0.013	2.5	0	0.29431	42579.3
779.33	2.5	-13.672	77.0216	0.783686			70.0159	0.2086	13.0513	0.2041	0	0.3975	0.0613	0.4196	1.7079	1.8185	5.348	0.1488	6.6185	1.6149	18.2647					0.081234	0.918766	0	0	0	0	2	0.06	0.4	0.014	1.6	0.0025	0.217594	271.79	59.1399	434.864	2.5	0.1	3.12	0.013	2.5	0	0.294962	42750
777.33	2.5	-13.716	76.5739	0.77913			70.1114	0.2062	13.0074	0.2012	0	0.3902	0.0616	0.409	1.6914	1.7906	5.3707	0.1497	6.6106	1.6522	18.6292					0.0814638	0.918536	0	0	0	0	2	0.06	0.4	0.014	1.6	0.0025	0.21804	273.002	59.5254	436.804	2.5	0.1	3.12	0.013	2.5	0	0.295513	42920.2
775.33	2.5	-13.76	76.1339	0.774653			70.2059	0.2038	12.964	0.1983	0	0.3831	0.0619	0.3987	1.6753	1.7626	5.3932	0.1505	6.6026	1.6885	18.9878					0.0816635	0.918336	0	0	0	0	2	0.06	0.4	0.014	1.6	0.0025	0.218427	274.208	59.8946	438.733	2.5	0.1	3.12	0.013	2.5	0	0.295993	43089.5
773.33	2.5	-13.804	75.7014	0.770253			70.2995	0.2015	12.9211	0.1955	0	0.376	0.0622	0.3887	1.6596	1.7347	5.4156	0.1514	6.5943	1.7237	19.3406					0.0818304	0.91817	0	0	0	0	2	0.06	0.4	0.014	1.6	0.0025	0.218751	275.408	60.2459	440.653	2.5	0.1	3.12	0.013	2.5	0	0.296393	43258.2
771.33	2.5	-13.848	75.2765	0.76593			70.3921	0.1992	12.8786	0.1927	0	0.369	0.0625	0.3789	1.6442	1.7068	5.4378	0.1522	6.5859	1.7579	19.6875					0.081971	0.918029	0	0	0	0	2	0.06	0.4	0.014	1.6	0.0025	0.219024	276.602	60.5824	442.563	2.5	0.1	3.12	0.013	2.5	0	0.29673	43425.9
769.33	2.5	-13.892	74.859	0.761682			70.4838	0.1969	12.8367	0.1899	0	0.3622	0.0628	0.3693	1.6292	1.6789	5.4599	0.1531	6.5773	1.7911	20.0287					0.082086	0.917914	0	0	0	0	2	0.06	0.4	0.014	1.6	0.0025	0.219247	277.789	60.9044	444.463	2.5	0.1	3.12	0.013	2.5	0	0.297006	43592.8
767.33	2.5	-13.937	74.4489	0.757509			70.5745	0.1946	12.7952	0.1872	0	0.3554	0.0631	0.36	1.6145	1.6511	5.4818	0.1539	6.5686	1.8234	20.3642					0.082181	0.917819	0	0	0	0	2	0.06	0.4	0.014	1.6	0.0025	0.219431	278.969	61.2145	446.351	2.5	0.1	3.12	0.013	2.5	0	0.297234	43758.7
765.33	2.5	-13.982	74.046	0.753409			70.6644	0.1924	12.7542	0.1845	0	0.3488	0.0634	0.3509	1.6001	1.6234	5.5036	0.1548	6.5597	1.8547	20.694					0.0822531	0.917747	0	0	0	0	2	0.06	0.4	0.014	1.6	0.0025	0.219571	280.142	61.5111	448.227	2.5	0.1	3.12	0.013	2.5	0	0.297407	43923.8
763.33	2.5	-14.026	73.6502	0.749382			70.7534	0.1902	12.7137	0.1818	0	0.3422	0.0637	0.342	1.586	1.5957	5.5251	0.1556	6.5506	1.8852	21.0181					0.0823113	0.917689	0	0	0	0	2	0.06	0.4	0.014	1.6	0.0025	0.219684	281.307	61.7986	450.091	2.5	0.1	3.12	0.013	2.5	0	0.297547	44087.7
761.33	2.5	-14.072	73.2616	0.745428			70.8414	0.188	12.6736	0.1792	0	0.3358	0.064	0.3334	1.5722	1.5682	5.5465	0.1564	6.5413	1.9148	21.3367					0.0823517	0.917648	0	0	0	0	2	0.06	0.4	0.014	1.6	0.0025	0.219762	282.464	62.075	451.943	2.5	0.1	3.12	0.013	2.5	0	0.297644	44250.6
759.33	2.5	-14.117	72.8798	0.741544			70.9286	0.1858	12.634	0.1766	0	0.3294	0.0643	0.3249	1.5587	1.5408	5.5678	0.1572	6.5318	1.9436	21.6498					0.082379	0.917621	0	0	0	0	2	0.06	0.4	0.014	1.6	0.0025	0.219815	283.614	62.3426	453.782	2.5	0.1	3.12	0.013	2.5	0	0.29771	44412.4
757.33	2.5	-14.162	72.505	0.737729			71.015	0.1837	12.5949	0.174	0	0.3232	0.0646	0.3167	1.5454	1.5135	5.5888	0.1581	6.5222	1.9716	21.9574					0.0823937	0.917606	0	0	0	0	2	0.06	0.4	0.014	1.6	0.0025	0.219844	284.755	62.6015	455.607	2.5	0.1	3.12	0.013	2.5	0	0.297745	44573.1
755.33	2.5	-14.208	72.1369	0.733984			71.1005	0.1816	12.5562	0.1715	0	0.3171	0.0649	0.3086	1.5324	1.4864	5.6096	0.1589	6.5124	1.9989	22.2597					0.0823996	0.9176	0	0	0	0	2	0.06	0.4	0.014	1.6	0.0025	0.219855	285.887	62.8537	457.418	2.5	0.1	3.12	0.013	2.5	0	0.297759	44732.5
753.33	2.5	-14.254	71.7754	0.730306			71.1851	0.1795	12.518	0.169	0	0.3111	0.0651	0.3008	1.5197	1.4594	5.6303	0.1597	6.5024	2.0254	22.5566					0.0823936	0.917606	0	0	0	0	2	0.06	0.4	0.014	1.6	0.0025	0.219844	287.01	63.0973	459.216	2.5	0.1	3.12	0.013	2.5	0	0.297745	44890.7
751.33	2.5	-14.3	71.4205	0.726695			71.2689	0.1774	12.4803	0.1666	0	0.3051	0.0654	0.2931	1.5071	1.4326	5.6507	0.1605	6.4923	2.0512	22.8482					0.0823795	0.917621	0	0	0	0	2	0.06	0.4	0.014	1.6	0.0025	0.219816	288.125	63.3345	461	2.5	0.1	3.12	0.013	2.5	0	0.297711	45047.8
749.33	2.5	-14.346	71.072	0.72315			71.3519	0.1753	12.443	0.1641	0	0.2993	0.0657	0.2857	1.4949	1.406	5.671	0.1612	6.482	2.0763	23.1347					0.0823569	0.917643	0	0	0	0	2	0.06	0.4	0.014	1.6	0.0025	0.219772	289.23	63.5648	462.769	2.5	0.1	3.12	0.013	2.5	0	0.297657	45203.6
747.33	2.5	-14.392	70.7299	0.719668			71.4341	0.1733	12.4061	0.1617	0	0.2936	0.0659	0.2784	1.4828	1.3795	5.691	0.162	6.4715	2.1008	23.416					0.0823301	0.91767	0	0	0	0	2	0.06	0.4	0.014	1.6	0.0025	0.21972	290.326	63.7906	464.522	2.5	0.1	3.12	0.013	2.5	0	0.297592	45358
745.33	2.5	-14.439	70.394	0.716251			71.5155	0.1712	12.3697	0.1594	0	0.2879	0.0662	0.2713	1.471	1.3533	5.7108	0.1628	6.4608	2.1246	23.6923					0.0822949	0.917705	0	0	0	0	2	0.06	0.4	0.014	1.6	0.0025	0.219652	291.413	64.0096	466.261	2.5	0.1	3.12	0.013	2.5	0	0.297508	45511.2
743.33	2.5	-14.485	70.0643	0.712896			71.5962	0.1692	12.3337	0.1571	0	0.2824	0.0665	0.2643	1.4593	1.3273	5.7305	0.1636	6.45	2.1478	23.9636					0.0822553	0.917745	0	0	0	0	2	0.06	0.4	0.014	1.6	0.0025	0.219575	292.491	64.2237	467.985	2.5	0.1	3.12	0.013	2.5	0	0.297413	45663
741.33	2.5	-14.532	69.7405	0.709602			71.676	0.1672	12.2982	0.1548	0	0.2769	0.0667	0.2576	1.4479	1.3015	5.7499	0.1643	6.439	2.1705	24.2301					0.082214	0.917786	0	0	0	0	2	0.06	0.4	0.014	1.6	0.0025	0.219495	293.558	64.4345	469.692	2.5	0.1	3.12	0.013	2.5	0	0.297314	45813.4
739.33	2.5	-14.579	69.4227	0.706368			71.7551	0.1653	12.2631	0.1525	0	0.2716	0.067	0.251	1.4366	1.2759	5.769	0.1651	6.4278	2.1925	24.4916					0.082165	0.917835	0	0	0	0	2	0.06	0.4	0.014	1.6	0.0025	0.2194	294.616	64.6388	471.386	2.5	0.1	3.12	0.013	2.5	0	0.297196	45962.6
737.33	2.5	-14.626	69.1107	0.703193			71.8335	0.1633	12.2284	0.1503	0	0.2663	0.0672	0.2445	1.4256	1.2506	5.788	0.1658	6.4165	2.214	24.7484					0.0821144	0.917886	0	0	0	0	2	0.06	0.4	0.014	1.6	0.0025	0.219302	295.664	64.8397	473.062	2.5	0.1	3.12	0.013	2.5	0	0.297074	46110.3
735.33	2.5	-14.674	68.8044	0.700076			71.9111	0.1614	12.1942	0.1481	0	0.2611	0.0675	0.2383	1.4147	1.2255	5.8068	0.1666	6.405	2.235	25.0006					0.0820617	0.917938	0	0	0	0	2	0.06	0.4	0.014	1.6	0.0025	0.2192	296.702	65.037	474.723	2.5	0.1	3.12	0.013	2.5	0	0.296948	46256.6
733.33	2.5	-14.721	68.5037	0.697017			71.988	0.1595	12.1604	0.1459	0	0.256	0.0677	0.2321	1.4039	1.2006	5.8253	0.1673	6.3933	2.2555	25.2481					0.0820074	0.917993	0	0	0	0	2	0.06	0.4	0.014	1.6	0.0025	0.219094	297.73	65.2309	476.367	2.5	0.1	3.12	0.013	2.5	0	0.296818	46401.4
731.33	2.5	-14.769	68.2084	0.694013			72.0642	0.1576	12.1269	0.1438	0	0.251	0.0679	0.2261	1.3934	1.176	5.8436	0.168	6.3814	2.2755	25.4911					0.081951	0.918049	0	0	0	0	2	0.06	0.4	0.014	1.6	0.0025	0.218985	298.747	65.4212	477.996	2.5	0.1	3.12	0.013	2.5	0	0.296682	46544.8
729.33	2.5	-14.817	67.9186	0.691064			72.1397	0.1557	12.0939	0.1416	0	0.2461	0.0682	0.2203	1.3829	1.1517	5.8617	0.1687	6.3694	2.295	25.7296					0.0818923	0.918108	0	0	0	0	2	0.06	0.4	0.014	1.6	0.0025	0.218871	299.755	65.6078	479.608	2.5	0.1	3.12	0.013	2.5	0	0.296542	46686.9
727.33	2.5	-14.865	67.6341	0.688169			72.2145	0.1538	12.0614	0.1396	0	0.2413	0.0684	0.2146	1.3727	1.1276	5.8796	0.1694	6.3572	2.3141	25.9638					0.0818342	0.918166	0	0	0	0	2	0.06	0.4	0.014	1.6	0.0025	0.218758	300.752	65.7921	481.204	2.5	0.1	3.12	0.013	2.5	0	0.296402	46827.4
725.33	2.5	-14.914	67.3547	0.685326			72.2887	0.152	12.0292	0.1375	0	0.2365	0.0686	0.2091	1.3625	1.1038	5.8972	0.1701	6.3448	2.3327	26.1936					0.0817737	0.918226	0	0	0	0	2	0.06	0.4	0.014	1.6	0.0025	0.218641	301.74	65.9727	482.784	2.5	0.1	3.12	0.013	2.5	0	0.296257	46966.5
723.33	2.5	-14.962	67.0805	0.682536			72.3621	0.1501	11.9974	0.1355	0	0.2318	0.0688	0.2036	1.3525	1.0803	5.9146	0.1708	6.3323	2.3509	26.4192					0.0817133	0.918287	0	0	0	0	2	0.06	0.4	0.014	1.6	0.0025	0.218524	302.717	66.1509	484.347	2.5	0.1	3.12	0.013	2.5	0	0.296112	47104.2
721.33	2.5	-15.011	66.2721	0.67431			72.3674	0.1488	12.0074	0.1328	0	0.2259	0.0696	0.1961	1.339	1.0512	5.975	0.1729	6.3139	2.3786	26.7829		0.3461			0.0806097	0.907661	0	0.0117292	0	0	2	0.06	0.4	0.014	1.6	0.0025	0.215843	305.922	66.0312	489.475	2.5	0.1	3.12	0.013	2.5	0	0.292443	47576.7
719.33	2.5	-15.06	64.6339	0.657642			72.2596	0.1481	12.0863	0.1291	0	0.218	0.0712	0.1854	1.3199	1.0132	6.1058	0.1773	6.2862	2.4201	27.3586		1.2336			0.0780368	0.882185	0	0.0397778	0	0	2	0.06	0.4	0.014	1.6	0.0025	0.209562	312.808	65.5525	500.493	2.5	0.1	3.12	0.013	2.5	0	0.283828	48601.9
717.33	2.5	-15.109	63.0908	0.641941			72.1518	0.1475	12.1649	0.1255	0	0.2104	0.0728	0.1754	1.3013	0.976	6.2343	0.1816	6.2585	2.4585	27.9011		2.0702			0.0758099	0.860354	0	0.0638363	0	0	2	0.06	0.4	0.014	1.6	0.0025	0.204135	319.608	65.2431	511.373	2.5	0.1	3.12	0.013	2.5	0	0.27639	49613.6
715.33	2.5	-15.159	61.6343	0.627121			72.0442	0.1468	12.2432	0.122	0	0.203	0.0743	0.166	1.2832	0.9397	6.3607	0.1859	6.2309	2.4942	28.4134		2.8605			0.0738626	0.841427	0	0.0847101	0	0	2	0.06	0.4	0.014	1.6	0.0025	0.199397	326.325	65.0682	522.121	2.5	0.1	3.12	0.013	2.5	0	0.2699	50612.3
713.33	2.5	-15.208	60.2569	0.613107			71.9369	0.1461	12.3211	0.1186	0	0.1959	0.0759	0.1572	1.2656	0.9042	6.4848	0.1902	6.2035	2.5274	28.898		3.6084			0.0721418	0.824861	0	0.102998	0	0	2	0.06	0.4	0.014	1.6	0.0025	0.195217	332.964	65.0002	532.742	2.5	0.1	3.12	0.013	2.5	0	0.264179	51598.6
711.33	2.5	-15.258	58.9521	0.59983			71.8297	0.1455	12.3987	0.1153	0	0.1891	0.0774	0.1489	1.2484	0.8696	6.6068	0.1944	6.176	2.5584	29.3571		4.3175			0.0706097	0.810231	0	0.119159	0	0	2	0.06	0.4	0.014	1.6	0.0025	0.191501	339.526	65.0198	543.242	2.5	0.1	3.12	0.013	2.5	0	0.259096	52572.9
709.33	2.5	-15.308	57.7137	0.58723			71.7229	0.1448	12.476	0.1121	0	0.1826	0.0789	0.1411	1.2317	0.836	6.7267	0.1986	6.1487	2.5875	29.793		4.991			0.0692373	0.797212	0	0.133551	0	0	2	0.06	0.4	0.014	1.6	0.0025	0.188177	346.016	65.1123	553.626	2.5	0.1	3.12	0.013	2.5	0	0.25455	53535.8
707.33	2.5	-15.358	56.5364	0.575251	1.9642	28.7834	71.6163	0.144	12.5529	0.109	0	0.1762	0.0803	0.1338	1.2155	0.8032	6.8445	0.2027	6.1215	2.6149	30.2075		5.6316			0.0680007	0.785549	0	0.14645	0	0	2	0.06	0.4	0.014	1.6	0.0025	0.185185	352.437	65.2659	563.899	2.5	0.1	3.12	0.013	2.5	0	0.250461	54487.7
705.33	2.5	-15.409	55.4154	0.563845	2.0468	27.0742	71.5101	0.1433	12.6295	0.106	0	0.1702	0.0817	0.1269	1.1996	0.7714	6.9602	0.2068	6.0943	2.6408	30.6023		6.2418			0.0668813	0.775038	0	0.158081	0	0	2	0.06	0.4	0.014	1.6	0.0025	0.182478	358.791	65.4715	574.066	2.5	0.1	3.12	0.013	2.5	0	0.246762	55429.2
703.33	2.5	-15.459	54.3463	0.552967	2.1257	25.5663	71.4043	0.1426	12.7058	0.1032	0	0.1643	0.0831	0.1204	1.184	0.7404	7.0738	0.2109	6.0673	2.6654	30.979		6.8241			0.0658636	0.765509	0	0.168627	0	0	2	0.06	0.4	0.014	1.6	0.0025	0.180018	365.083	65.7217	584.133	2.5	0.1	3.12	0.013	2.5	0	0.243402	56360.6
701.33	2.5	-15.51	44.8418	0.45626	2.7257	16.4515	71.1365	0.1422	12.9981	0.1001	0	0.1593	0.0993	0.1163	1.1947	0.6608	7.1266	0.2556	6.0106	2.7143	31.3101	4.9022	10.4004			0.0550267	0.634746	0.0993817	0.210846	0	0	2	0.06	0.4	0.014	1.6	0.0025	0.190843	423.8	80.879	678.08	2.5	0.1	3.12	0.013	2.5	0	0.561556	50783
699.33	2.5	-15.561	36.0247	0.366547	3.2776	10.9912	70.8093	0.1415	13.3781	0.0974	0	0.1553	0.1211	0.1135	1.2091	0.5816	7.1301	0.3181	5.9449	2.7541	31.5182	9.6048	13.6712			0.0478572	0.547683	0.1669	0.23756	0	0	2	0.06	0.4	0.014	1.6	0.0025	0.198661	501.984	99.7246	803.174	2.5	0.1	3.12	0.013	2.5	0	0.778339	44969.5
697.33	2.5	-15.612	30.3999	0.309316	3.629	8.37695	70.5046	0.1404	13.7337	0.0951	0	0.1518	0.141	0.1109	1.2209	0.5216	7.1177	0.377	5.8854	2.7799	31.6456	12.6035	15.7631			0.0442715	0.503974	0.200718	0.251036	0	0	2	0.06	0.4	0.014	1.6	0.0025	0.202583	572.495	115.978	915.992	2.5	0.1	3.12	0.013	2.5	0	0.886924	41107.9
695.33	2.5	-15.664	26.5264	0.269903	3.8706	6.8533	70.2194	0.1392	14.0664	0.093	0	0.1485	0.159	0.1086	1.2334	0.4741	7.0956	0.432	5.8309	2.7982	31.7271	14.6697	17.2071			0.0421402	0.477803	0.220922	0.259135	0	0	2	0.06	0.4	0.014	1.6	0.0025	0.204945	636.254	130.397	1018.01	2.5	0.1	3.12	0.013	2.5	0	0.95182	38344.9
693.33	2.5	-15.715	23.6893	0.241036	4.0475	5.85283	69.9502	0.1379	14.3798	0.0911	0	0.1455	0.1754	0.1063	1.2475	0.4351	7.0672	0.4838	5.7804	2.8121	31.7819	16.1841	18.2672			0.0407283	0.460305	0.234398	0.264568	0	0	2	0.06	0.4	0.014	1.6	0.0025	0.206538	694.55	143.451	1111.28	2.5	0.1	3.12	0.013	2.5	0	0.995125	36250.6
691.33	2.5	-15.767	21.511	0.218872	4.1831	5.14236	69.694	0.1365	14.6769	0.0893	0	0.1426	0.1905	0.1042	1.2634	0.4023	7.0345	0.5328	5.7331	2.8232	31.8206	17.3472	19.0829			0.039722	0.447711	0.244073	0.268494	0	0	2	0.06	0.4	0.014	1.6	0.0025	0.207695	748.481	155.456	1197.57	2.5	0.1	3.12	0.013	2.5	0	1.02623	34593.7
689.33	2.5	-15.819	19.7767	0.201225	4.291	4.60887	69.4483	0.1351	14.9607	0.0877	0	0.1399	0.2045	0.1022	1.2811	0.3741	6.9988	0.5795	5.6883	2.8324	31.8491	18.273	19.7338			0.0389664	0.43816	0.251388	0.271485	0	0	2	0.06	0.4	0.014	1.6	0.0025	0.208579	798.896	166.633	1278.23	2.5	0.1	3.12	0.013	2.5	0	1.04976	33239.5
687.33	2.5	-15.871	18.3562	0.186773	4.3793	4.19159	69.2115	0.1336	15.233	0.0861	0	0.1373	0.2177	0.1002	1.3003	0.3495	6.9609	0.6243	5.6457	2.8403	31.871	19.0306	20.2681			0.0383772	0.430631	0.257136	0.273856	0	0	2	0.06	0.4	0.014	1.6	0.0025	0.209281	846.441	177.144	1354.31	2.5	0.1	3.12	0.013	2.5	0	1.06825	32104.5
685.33	2.5	-15.924	17.1664	0.174666	4.4532	3.85485	68.9822	0.1322	15.4956	0.0846	0	0.1347	0.23	0.0983	1.3208	0.3278	6.9213	0.6676	5.6048	2.8472	31.8886	19.6641	20.7165			0.0379038	0.424522	0.261782	0.275792	0	0	2	0.06	0.4	0.014	1.6	0.0025	0.209853	891.613	187.107	1426.58	2.5	0.1	3.12	0.013	2.5	0	1.08321	31134.8
683.33	2.5	-15.977	16.1514	0.164338	4.5162	3.57632	68.7594	0.1307	15.7497	0.0832	0	0.1323	0.2418	0.0965	1.3426	0.3083	6.8805	0.7095	5.5654	2.8534	31.9033	20.2032	21.0999			0.0375152	0.41945	0.265623	0.277412	0	0	2	0.06	0.4	0.014	1.6	0.0025	0.21033	934.797	196.616	1495.68	2.5	0.1	3.12	0.013	2.5	0	1.09558	30293
681.33	2.5	-16.03	15.2723	0.155394	4.5707	3.34135	68.5421	0.1293	15.9965	0.0818	0	0.1299	0.2529	0.0947	1.3655	0.2909	6.8388	0.7504	5.5272	2.8591	31.916	20.6687	21.4326			0.0371909	0.41516	0.268856	0.278793	0	0	2	0.06	0.4	0.014	1.6	0.0025	0.210737	976.296	205.742	1562.07	2.5	0.1	3.12	0.013	2.5	0	1.106	29552.5
679.33	2.5	-16.083	14.2709	0.145205	4.6307	3.0818	68.3109	0.1277	16.2205	0.0806	0	0.1276	0.2672	0.093	1.4056	0.2751	6.7958	0.803	5.4932	2.865	31.9159	21.1892	21.8074			0.0368358	0.410349	0.272434	0.280382	0	0	2	0.06	0.4	0.014	1.6	0.0025	0.211191	1029.07	217.331	1646.52	2.5	0.1	3.12	0.013	2.5	0	1.11753	28695.2
677.33	2.5	-16.136	9.06167	0.0922014	4.9105	1.84537	67.4717	0.1234	15.9503	0.081	0	0.125	0.386	0.0932	1.9589	0.2636	6.7291	1.2647	5.5531	2.8849	31.7018	23.7627	23.6823			0.0351681	0.386458	0.289677	0.288697	0	0	2	0.06	0.4	0.014	1.6	0.0025	0.213436	1464.57	312.592	2343.31	2.5	0.1	3.12	0.013	2.5	0	1.17316	23825.4
675.33	2.5	-16.19	6.40446	0.0651646	5.0533	1.26738	66.528	0.1192	15.6492	0.0815	0	0.1224	0.5048	0.0937	2.5846	0.2539	6.6523	1.7894	5.621	2.8967	31.6093	25.0573	24.6386			0.0344018	0.375399	0.297586	0.292613	0	0	2	0.06	0.4	0.014	1.6	0.0025	0.214459	1918.9	411.525	3070.24	2.5	0.1	3.12	0.013	2.5	0	1.19866	20926.5
673.33	2.5	-16.244	4.81777	0.0490202	5.1384	0.937601	65.4732	0.1152	15.3169	0.0821	0	0.1197	0.6241	0.0946	3.2859	0.2447	6.5671	2.3787	5.6979	2.9053	31.5656	25.8173	25.2099			0.0339809	0.369197	0.301963	0.294859	0	0	2	0.06	0.4	0.014	1.6	0.0025	0.215027	2395.69	515.137	3833.1	2.5	0.1	3.12	0.013	2.5	0	1.21277	18951.7
671.33	2.5	-16.298	3.45887	0.0351936	5.2117	0.663675	64.4019	0.1108	14.9844	0.083	0	0.1175	0.7887	0.0958	3.9678	0.2363	6.4702	2.9508	5.7928	2.9132	31.5242	26.4541	25.6893		0.0296	0.0336357	0.363977	0.305438	0.296608	0	0.00034176	2	0.06	0.4	0.014	1.6	0.0025	0.215439	3103.12	668.531	4964.99	2.5	0.1	3.12	0.013	2.5	0	1.22392	17014.8
669.33	2.5	-16.352	1.90668	0.0194002	5.297	0.359954	63.6949	0.1053	14.7676	0.0845	0	0.118	1.1405	0.0971	4.2754	0.2316	6.3543	3.2029	5.928	2.9219	31.4572	27.1627	26.2157		0.1263	0.0332473	0.357941	0.309075	0.2983	0	0.00143712	2	0.06	0.4	0.014	1.6	0.0025	0.215781	4944.76	1066.98	7911.61	2.5	0.1	3.12	0.013	2.5	0	1.23546	14228.1
667.33	2.5	-16.407	1.11496	0.0113446	5.341	0.208754	62.8526	0.1	14.5131	0.0863	0	0.1184	1.5196	0.0988	4.6568	0.2267	6.2249	3.517	6.0857	2.9283	31.4357	27.506	26.4837		0.1779	0.0330763	0.355079	0.310691	0.299144	0	0.00200945	2	0.06	0.4	0.014	1.6	0.0025	0.215927	7526.6	1625.19	12042.6	2.5	0.1	3.12	0.013	2.5	0	1.24058	12255.5
665.33	2.5	-16.461	0.657594	0.00669094	5.3667	0.122532	61.7965	0.0949	14.1994	0.0885	0	0.119	1.9393	0.1014	5.1568	0.2212	6.075	3.93	6.2782	2.9338	31.4339	27.6897	26.638		0.2094	0.0329993	0.353568	0.311453	0.299624	0	0.00235533	2	0.06	0.4	0.014	1.6	0.0025	0.215995	11382.5	2458.57	18212.1	2.5	0.1	3.12	0.013	2.5	0	1.24298	10664.3
663.33	2.5	-16.516	0.374657	0.00381209	5.383	0.0696001	60.3044	0.0894	13.7651	0.0914	0	0.1195	2.4383	0.1054	5.9013	0.2138	5.884	4.5472	6.5402	2.9387	31.4423	27.7906	26.7331		0.2302	0.0329691	0.35275	0.311781	0.299917	0	0.0025826	2	0.06	0.4	0.014	1.6	0.0025	0.216021	17689.9	3821.4	28303.9	2.5	0.1	3.12	0.013	2.5	0	1.24401	9248.75
[truncated: 3 more columns]
