# Supplementary material for: Unlocking the secrets of pegmatite-type lithium deposits: control of melt-fluid mass ratio
Source: Research Square preprint supplement (doi:10.21203/rs.3.rs-5749452/v1), 2025-02-06
Supplement: Supplementary file 3 [file dc9db822b987e0d83855db0b.xlsx]

## Sheet: Sheet1
Table S3. Calculated the initial melt Li content (ppm) and LiPI at various DLiFluid/melt and melt/fluid mass ratios, for a giving CLiFluid of 15000 ppm
	Mass of magma (g)	DLiFluid/melt	CLiMelt0	LiPI	DLiFluid/melt	CLiMelt0	LiPI	DLiFluid/melt	CLiMelt0	LiPI	DLiFluid/melt	CLiMelt0	LiPI	DLiFluid/melt	CLiMelt0	LiPI	DLiFluid/melt	CLiMelt0	LiPI	DLiFluid/melt	CLiMelt0	LiPI	DLiFluid/melt	CLiMelt0	LiPI	DLiFluid/melt	CLiMelt0	LiPI
0.1	0.404601	0.7	15584.4	0.856493	1	15000	0.809202	2	14318.2	0.754029	3	14090.9	0.735638	3.2	14062.5	0.733339	3.4	14037.4	0.731311	3.6	14015.2	0.729508	3.8	13995.2	0.727895	4	13977.3	0.726443
0.4	1.25122	0.7	16836.7	2.96206	1	15000	2.50243	2	12857.1	1.9662	3	12142.9	1.78745	3.2	12053.6	1.76511	3.4	11974.8	1.74539	3.6	11904.8	1.72787	3.8	11842.1	1.71219	4	11785.7	1.69808
0.8	2.35626	0.7	17857.1	6.05896	1	15000	4.71253	2	11666.7	3.14169	3	10555.6	2.61807	3.2	10416.7	2.55262	3.4	10294.1	2.49487	3.6	10185.2	2.44353	3.8	10087.7	2.3976	4	10000	2.35626
0.9	2.62828	0.7	18045.1	6.85724	1	15000	5.25656	2	11447.4	3.3891	3	10263.2	2.76661	3.2	10115.1	2.6888	3.4	9984.52	2.62014	3.6	9868.42	2.55912	3.8	9764.54	2.50451	4	9671.05	2.45537
1	2.8986	0.7	18214.3	7.66059	1	15000	5.7972	2	11250	3.62325	3	10000	2.8986	3.2	9843.75	2.80802	3.4	9705.88	2.72809	3.6	9583.33	2.65705	3.8	9473.68	2.59348	4	9375	2.53627
2	5.5084	0.7	19285.7	15.7383	1	15000	11.0168	2	10000	5.5084	3	8333.33	3.67227	3.2	8125	3.44275	3.4	7941.18	3.24024	3.6	7777.78	3.06022	3.8	7631.58	2.89916	4	7500	2.7542
3	7.9484	0.7	19821.4	23.5613	1	15000	15.8968	2	9375	6.95485	3	7500	3.9742	3.2	7265.62	3.60162	3.4	7058.82	3.27287	3.6	6875	2.98065	3.8	6710.53	2.71919	4	6562.5	2.48388
4	10.2186	0.7	20142.9	30.9478	1	15000	20.4372	2	9000	8.17488	3	7000	4.08744	3.2	6750	3.57651	3.4	6529.41	3.12569	3.6	6333.33	2.72496	3.8	6157.89	2.36641	4	6000	2.04372
5	12.319	0.7	20357.1	37.8369	1	15000	24.638	2	8750	9.23925	3	6666.67	4.10633	3.2	6406.25	3.46472	3.4	6176.47	2.89859	3.6	5972.22	2.39536	3.8	5789.47	1.94511	4	5625	1.53987
6	14.2496	0.7	20510.2	44.2028	1	15000	28.4992	2	8571.43	10.1783	3	6428.57	4.07131	3.2	6160.71	3.30794	3.4	5924.37	2.63438	3.6	5714.29	2.03566	3.8	5526.32	1.49996	4	5357.14	1.01783
7	16.0104	0.7	20625	50.0325	1	15000	32.0208	2	8437.5	11.0072	3	6250	4.0026	3.2	5976.56	3.12703	3.4	5735.29	2.35447	3.6	5520.83	1.66775	3.8	5328.95	1.05332	4	5156.25	0.500325
8	17.6014	0.7	20714.3	55.3187	1	15000	35.2028	2	8333.33	11.7343	3	6111.11	3.91142	3.2	5833.33	2.93357	3.4	5588.24	2.07075	3.6	5370.37	1.30381	3.8	5175.44	0.617593	4	5000	0
9	19.0226	0.7	20785.7	60.0571	1	15000	38.0452	2	8250	12.3647	3	6000	3.80452	3.2	5718.75	2.7345	3.4	5470.59	1.79036	3.6	5250	0.95113	3.8	5052.63	0.200238	4	4875	-0.475565
10	20.274	0.7	20844.2	64.2449	1	15000	40.548	2	8181.82	12.9016	3	5909.09	3.68618	3.2	5625	2.53425	3.4	5374.33	1.51784	3.6	5151.52	0.614364	3.8	4952.15	-0.19401	4	4772.73	-0.921545
11	21.3556	0.7	20892.9	67.8803	1	15000	42.7112	2	8125	13.3472	3	5833.33	3.55927	3.2	5546.87	2.33577	3.4	5294.12	1.25621	3.6	5069.44	0.296606	3.8	4868.42	-0.561989	4	4687.5	-1.33472
12	22.2674	0.7	20934.1	70.962	1	15000	44.5348	2	8076.92	13.703	3	5769.23	3.42575	3.2	5480.77	2.1411	3.4	5226.24	1.00757	3.6	5000	-4.05042e-15	3.8	4797.57	-0.901514	4	4615.38	-1.71288
13	23.0094	0.7	20969.4	73.4892	1	15000	46.0188	2	8035.71	13.97	3	5714.29	3.28706	3.2	5424.11	1.95169	3.4	5168.07	0.773425	3.6	4940.48	-0.273921	3.8	4736.84	-1.21102	4	4553.57	-2.05441
14	23.5816	0.7	21000	75.4611	1	15000	47.1632	2	8000	14.149	3	5666.67	3.14421	3.2	5375	1.76862	3.4	5117.65	0.554861	3.6	4888.89	-0.524036	3.8	4684.21	-1.48936	4	4500	-2.35816
15	23.984	0.7	21026.8	76.8773	1	15000	47.968	2	7968.75	14.2405	3	5625	2.998	3.2	5332.03	1.59269	3.4	5073.53	0.352706	3.6	4843.75	-0.7495	3.8	4638.16	-1.73568	4	4453.12	-2.62325
16	24.2166	0.7	21050.4	77.7373	1	15000	48.4332	2	7941.18	14.2451	3	5588.24	2.84901	3.2	5294.12	1.42451	3.4	5034.6	0.167589	3.6	4803.92	-0.949671	3.8	4597.52	-1.94932	4	4411.76	-2.84901
17	24.2794	0.7	21071.4	78.0409	1	15000	48.5588	2	7916.67	14.163	3	5555.56	2.69771	3.2	5260.42	1.26455	3.4	5000	0	3.6	4768.52	-1.12405	3.8	4561.4	-2.12977	4	4375	-3.03492
18	24.1724	0.7	21090.2	77.7879	1	15000	48.3448	2	7894.74	13.9945	3	5526.32	2.54446	3.2	5230.26	1.1132	3.4	4969.04	-0.149674	3.6	4736.84	-1.27223	3.8	4529.09	-2.27662	4	4342.11	-3.18058
19	23.8956	0.7	21107.1	76.978	1	15000	47.7912	2	7875	13.74	3	5500	2.38956	3.2	5203.12	0.970759	3.4	4941.18	-0.281125	3.6	4708.33	-1.39391	3.8	4500	-2.38956	4	4312.5	-3.28565
20	23.449	0.7	21122.4	75.6111	1	15000	46.898	2	7857.14	13.3994	3	5476.19	2.23324	3.2	5178.57	0.837464	3.4	4915.97	-0.394101	3.6	4682.54	-1.48883	3.8	4473.68	-2.46832	4	4285.71	-3.34986
21	22.8326	0.7	21136.4	73.687	1	15000	45.6652	2	7840.91	12.9731	3	5454.55	2.07569	3.2	5156.25	0.713519	3.4	4893.05	-0.488398	3.6	4659.09	-1.55677	3.8	4449.76	-2.51268	4	4261.36	-3.373
22	22.0464	0.7	21149.1	71.2058	1	15000	44.0928	2	7826.09	12.461	3	5434.78	1.91708	3.2	5135.87	0.599087	3.4	4872.12	-0.563847	3.6	4637.68	-1.59757	3.8	4427.92	-2.52247	4	4239.13	-3.35489
23	21.0904	0.7	21160.7	68.1672	1	15000	42.1808	2	7812.5	11.8633	3	5416.67	1.75753	3.2	5117.19	0.494306	3.4	4852.94	-0.620306	3.6	4618.06	-1.61107	3.8	4407.89	-2.49755	4	4218.75	-3.29537
24	19.9646	0.7	21171.4	64.5712	1	15000	39.9292	2	7800	11.1802	3	5400	1.59717	3.2	5100	0.399292	3.4	4835.29	-0.657657	3.6	4600	-1.59717	3.8	4389.47	-2.43778	4	4200	-3.19434
25	18.669	0.7	21181.3	60.4178	1	15000	37.338	2	7788.46	10.4116	3	5384.62	1.43608	3.2	5084.13	0.314142	3.4	4819	-0.675801	3.6	4583.33	-1.55575	3.8	4372.47	-2.34307	4	4182.69	-3.05166
26	17.2036	0.7	21190.5	55.7069	1	15000	34.4072	2	7777.78	9.55756	3	5370.37	1.27434	3.2	5069.44	0.238939	3.4	4803.92	-0.674651	3.6	4567.9	-1.48673	3.8	4356.73	-2.21333	4	4166.67	-2.86727
27	15.5684	0.7	21199	50.4384	1	15000	31.1368	2	7767.86	8.61822	3	5357.14	1.11203	3.2	5055.8	0.173754	3.4	4789.92	-0.654134	3.6	4553.57	-1.39004	3.8	4342.11	-2.04847	4	4151.79	-2.64107
28	13.7634	0.7	21206.9	44.6124	1	15000	27.5268	2	7758.62	7.5936	3	5344.83	0.9492	3.2	5043.1	0.11865	3.4	4776.88	-0.614188	3.6	4540.23	-1.2656	3.8	4328.49	-1.84844	4	4137.93	-2.373
29	11.7886	0.7	21214.3	38.2287	1	15000	23.5772	2	7750	6.48373	3	5333.33	0.785907	3.2	5031.25	0.0736788	3.4	4764.71	-0.554758	3.6	4527.78	-1.11337	3.8	4315.79	-1.61318	4	4125	-2.063
30	9.644	0.7	21221.2	31.2874	1	15000	19.288	2	7741.94	5.28865	3	5322.58	0.622194	3.2	5020.16	0.0388871	3.4	4753.32	-0.475795	3.6	4516.13	-0.93329	3.8	4303.9	-1.34263	4	4112.9	-1.71103
